## Two new polymorphic structures of alpha-synuclein solved by cryo-electron microscopy

Ricardo Guerrero-Ferreira<sup>1,9</sup>, Nicholas M.I. Taylor<sup>2</sup>, Ana-Andrea Arteni<sup>3,4</sup>, Pratibha Kumari<sup>5</sup>, Daniel Mona<sup>6</sup>, Philippe Ringler<sup>1</sup>, Markus Britschgi<sup>6</sup>, Matthias E. Lauer<sup>7</sup>, Joeri Verasdock<sup>5</sup>, Roland Riek<sup>5</sup>, Ronald Melki<sup>4</sup>, Beat H. Meier<sup>5</sup>, Anja Böckmann<sup>8,\*</sup>, Luc Bousset<sup>4,\*</sup>, and Henning Stahlberg<sup>1,\*</sup>

<sup>1</sup> Center for Cellular Imaging and NanoAnalytics (C-CINA), Biozentrum, University of Basel, Mattenstrasse 26, 4058 Basel, Switzerland.

<sup>2</sup> Structural Biology of Molecular Machines Group, Protein Structure & Function Programme, Novo Nordisk Foundation Center for Protein Research, Faculty of Health and Medical Sciences, University of Copenhagen, Blegdamsvej 3B, Copenhagen 2200, Denmark.

<sup>3</sup> Institut de Biologie Intégrative de la Cellule (I2BC), CEA, CNRS, Université Paris Sud, Université Paris-Saclay, Gif-sur-Yvette, France

<sup>4</sup> Institut Francois Jacob (MIRcen), CEA and Laboratory of Neurodegenerative Diseases, CNRS, 18 Route du Panorama, 92265 Fontenay-Aux-Roses cedex, France

<sup>5</sup> Laboratory of Physical Chemistry, ETH Zurich, 8093 Zurich, Switzerland.

<sup>6</sup> Roche Pharma Research and Early Development, Neuroscience and Rare Diseases Discovery and Translational Area/Neuroscience Discovery, Roche Innovation Center Basel, Basel, Switzerland.

<sup>7</sup> Roche Pharma Research and Early Development, Chemical Biology, Roche Innovation Center Basel, Basel, Switzerland.

<sup>8</sup> Molecular Microbiology and Structural Biochemistry, Labex Ecofect, UMR 5086 CNRS, Université de Lyon, 7 passage du Vercors, 69367 Lyon, France

<sup>9</sup> current address: Robert P. Apkarian Integrated Electron Microscopy Core, Emory University School of Medicine, 1521 Dickey Drive NE, Atlanta, Georgia 30322, USA

\* Correspondence to:

Anja Böckmann ([a.boeckmann@ibcp.fr](mailto:a.boeckmann@ibcp.fr))

Luc Bousset ([luc.bousset@cnrs.fr](mailto:luc.bousset@cnrs.fr))

Henning Stahlberg ([henning.stahlberg@unibas.ch](mailto:henning.stahlberg@unibas.ch)).

## Abstract

Intracellular inclusions containing an enrichment of alpha-synuclein protein are characteristic for several neuropathological diseases including Parkinson's disease (PD). Recent studies using cryo-electron microscopy and helical reconstruction approaches had determined the structure of fibrillar recombinant human alpha-synuclein (polymorphs 1a and 1b). Here, we describe two new polymorphic atomic structures of alpha-synuclein fibrils (polymorph 2a at 3.1 Å resolution and polymorph 2b at 3.5 Å), which show a radically different arrangement in the protofilament compared to the previously investigated polymorphs. All structures are fibrils of 10 nm diameter that are composed of two protofilaments. The strong steric-zipper geometry at the protofilament interface in previously described polymorphs is absent in the polymorphs described here. Instead, they interact via intermolecular salt-bridges between amino acids K45, E57 (polymorph 2a) or E46 (polymorph 2b). The non-amyloid component (NAC) region of alpha-synuclein is fully buried by previously non-described interactions with the N-terminus. A hydrophobic cleft, the location of familial PD mutation sites, and the nature of the protofilament interface now invite to formulate hypotheses about fibril formation, growth and stability. If such structures can be identified in human brain they open new avenues for the design of tools such as small molecules or antibodies targeting the various amyloid forms of alpha-synuclein for better diagnosis and assessment of potential therapies targeting alpha-synuclein deposits.

## Impact statement

Two new polymorphic structures of recombinant human alpha-synuclein fibrils are reported here. Besides striking differences with previous structures, familial PD mutation sites remain crucial for protofilament interaction and fibril stability.

## Introduction

Lewy bodies (LB) and Lewy neurites (LN) are neuropathological hallmarks of Parkinson's disease and other neurodegenerative disorders. These intracellular neuronal features contain a cytoplasmic enrichment of the protein alpha-synuclein ( $\alpha$ -Syn), thereby defining these diseases as synucleinopathies (Spillantini *et al.*, 1998; Spillantini *et al.*, 1997). Apart from this finding in the postmortem brain, the central role of  $\alpha$ -Syn in Parkinson's disease (PD) is highlighted by the fact that certain mutations in the  $\alpha$ -Syn gene (SNCA) cause familial forms of PD and other synucleinopathies (Appel-Cresswell *et al.*, 2013; Kruger *et al.*, 1998; Lesage *et al.*, 2013; Pasanen *et al.*, 2014; Polymeropoulos *et al.*, 1997; Zarranz *et al.*, 2004), and that duplication or triplication of the gene encoding  $\alpha$ -Syn (SNCA) lead to early-onset PD in affected families (Ibanez *et al.*, 2004; Singleton *et al.*, 2003). The 14 kDa protein  $\alpha$ -Syn is known to readily form fibrils *in vitro* (Hashimoto *et al.*, 1998) and induce  $\alpha$ -Syn inclusions when injected in model animals (Peelaerts *et al.*, 2015).

Shahmoradian *et al.* (Shahmoradian *et al.*, 2019) have recently investigated the ultrastructure of LBs, using identification by fluorescence light microscopy and then correlative imaging by electron microscopy (CLEM). They found that a small minority of analyzed LBs contained filamentous or dense proteinaceous structures, while the vast majority of LBs was primarily composed of membrane fragments (Shahmoradian *et al.*, 2019). However, even in those cases, LBs had been identified due to their enrichment of  $\alpha$ -Syn (antibody LB509, recognizing residues 115-122 of  $\alpha$ -Syn). Moors *et al.* (Moors *et al.*, 2018) recently studied the ultrastructure of LBs by super-resolution light microscopy, revealing an onion-like distribution of different forms of  $\alpha$ -Syn in nigral LBs and LNs. Their work suggests LBs to be structured encapsulations of aggregated proteins and lipids. While the structure and building blocks of LBs and the putative involvement of aggregated forms of  $\alpha$ -Syn in the formation of LBs or in toxicity towards neurons and glia appear to be more complex than previously thought, it is clear that the protein  $\alpha$ -Syn plays a pivotal role for PD, and therefore for LB formation. A detailed understanding of the conformational space of structural polymorphs of  $\alpha$ -Syn is important to move forward the discovery of diagnostic tools and therapeutics for synucleinopathies, including PD.

$\alpha$ -Syn protein consists of 140 amino acids. The N-terminus of  $\alpha$ -Syn (residues 1-60) is rich in lysine residues and contains KTK lipid-binding motif repeats associated with vesicle binding (George, 2002; George *et al.*, 1995; Perrin *et al.*, 2000). It is also the region which contains all known SNCA familial PD mutations: A30P (Kruger *et al.*, 1998), E46K (Zarranz *et al.*, 2004), H50Q (Appel-Cresswell *et al.*, 2013), G51D (Lesage *et al.*, 2013), A53E (Pasanen *et al.*, 2014), and A53T (Polymeropoulos *et al.*, 1997). The central region (residues 61-95) is the non-amyloid- $\beta$  component (NAC region) (Giasson *et al.*, 2001; Ueda *et al.*, 1993), which is essential for  $\alpha$ -Syn aggregation (Li *et al.*, 2002). In contrast, the related protein  $\beta$ -synuclein ( $\beta$ -syn) (Jakes *et al.*, 1994; Stefanis, 2012) lacks a stretch of 12 aminoacid residues within the NAC region (residues 71-82) and is unable to form fibrils.

The highly unstructured C-terminus of  $\alpha$ -Syn (residues 96-140) can bind calcium and is populated by negatively charged residues (Li *et al.*, 2007; Post *et al.*, 2018; Vilar *et al.*, 2008). Truncation of this domain may play a role in  $\alpha$ -Syn pathology by promoting fibril formation (Crowther *et al.*, 1998; Li *et al.*, 2005; Liu *et al.*, 2005; Wang *et al.*, 2016) and being involved in Lewy body formation (Dufty *et al.*, 2007; Mahul-Mellier *et al.*, 2019; Prasad *et al.*, 2012). Inhibition of C-terminal truncation has also been shown to reduce neurodegeneration in a transgenic mouse model of Multiple System Atrophy (MSA) (Bassil *et al.*, 2016).

Amyloid fibrils, even within a single sample, may exhibit heterogeneous conformations, referred to as polymorphism. Different polymorphs can be distinguished based on their diameter, their twist, how many protofilaments form a fibril (Riek, 2017), their behavior under limited proteolysis, their appearance under fiber diffraction (Bousset *et al.*, 2013), or based on their structure using NMR or cryo-EM (Close *et al.*, 2018; Fandrich *et al.*, 2018; Meier and Bockmann, 2015). The polymorphs can be structurally different at the level of the protofibrils, or in the way the protofilament assemble. Specifically for  $\alpha$ -Syn fibrils, structural heterogeneity has been observed based on solid-state NMR (Bousset *et al.*, 2013; Comellas *et al.*, 2012; Comellas *et al.*, 2011; Gath *et al.*, 2012; Gath *et al.*, 2014a; Gath *et al.*, 2014b; Heise *et al.*, 2005; Lv *et al.*, 2012; Verasdonck *et al.*, 2016; Vilar *et al.*, 2008), quenched hydrogen/deuterium (H/D) exchange data (Vilar *et al.*, 2008) and cryo-EM (Guerrero-Ferreira *et al.*, 2018; Li *et al.*, 2018a; Li *et al.*, 2018b). A detailed understanding of the conformational space the structural polymorphs of  $\alpha$ -Syn do access is central not only to understand how the same polypeptide chain can fold into different structures, but also to thoroughly characterize material used in *in vitro* and *in vivo* experiments.,

Our recent work on the structure of recombinant  $\alpha$ -Syn(1-121), using cryo-electron microscopy (cryo-EM) (Guerrero-Ferreira *et al.*, 2018) and confirmed by other investigations on full-length  $\alpha$ -Syn (Li *et al.*, 2018a; Li *et al.*, 2018b) revealed  $\alpha$ -Syn fibrils in a structure composed of two protofilaments that buried the sites associated with familial PD in the interface region between the two protofilaments. This is here termed  $\alpha$ -Syn polymorph 1a. Li *et al.* (Li *et al.*, 2018a) reported an additional polymorph, here termed  $\alpha$ -Syn polymorph 1b, in which the interface between virtually identical protofilaments is different. Previous reports on the structure of  $\alpha$ -Syn fibrils by micro-electron diffraction (microED; (Rodriguez *et al.*, 2015)) or solid-state NMR (Tuttle *et al.*, 2016) either focused on small peptides, or did not describe the two protofilaments and the interface region.

Here, we report new cryo-EM polymorphic structures of *in vitro* generated amyloid fibrils of  $\alpha$ -Syn (denoted polymorphs 2a and 2b). Our structures reveal remarkable differences to the previously solved  $\alpha$ -Syn polymorphs, and inform new hypotheses to explain fibril assembly, the potential role of familial PD mutations on fibril structure, and contribute to our understanding of amyloid fibril polymorphism.



## Results and Discussion

### The structure of $\alpha$ -Syn fibril polymorphs

Fibrils of recombinant, full-length, human  $\alpha$ -Syn were prepared using the conditions summarized in **Table 1**. Preformed fibrils (PFFs) were quick-frozen in holey carbon-coated copper grids and imaged with a Titan Krios electron microscope at 300kV, equipped with a Quantum-LS energy filter. Micrographs were acquired with a K2 Summit direct electron detector, drift-corrected and dose-weighted through the FOCUS interface (Biyani et al., 2017).

Helical image processing of 100'323 fibril segments extracted from 1'143 recorded micrographs, revealed the presence of two distinct fibril polymorphs at the step of 3D classification. These polymorphs, termed  $\alpha$ -Syn polymorph 2a and  $\alpha$ -Syn polymorph 2b to distinguish them from the previously described  $\alpha$ -Syn fibrils ( $\alpha$ -Syn polymorphs 1a and 1b (Guerrero-Ferreira et al., 2018; Li et al., 2018a; Li et al., 2018b)), were separately refined, resulting in 3D reconstructions at overall resolutions of 3.1 Å and 3.5 Å respectively (**Table 2, Figure 1, Figure 1-figure supplement. 1 and Video 1**). The maps show clear side-chain densities and  $\beta$ -strand separation along the helical axis, and indicate that both fibril types are formed by two protofilaments of approximately 5 nm diameter, which are composed of distinct rungs of density.

Refined atomic models of the fibril cores indicate that polymorph 2a and polymorph 2b in terms of their local atomic structure share a common protofilament kernel, and which is clearly distinct from the one described previously in polymorphs 1a and 1b. However, the packing between the two protofilaments is different. Therefore,  $\alpha$ -Syn fibrils exhibit assembly polymorphism as defined by Riek (2017) (Riek, 2017) and described in Tau between paired helical filaments (PHFs) and straight filaments (SFs) (Fitzpatrick et al., 2017). In each protofilament of the new  $\alpha$ -Syn polymorphs, successive rungs of  $\beta$ -strands are related by helical symmetry with a rise of 4.9 Å and a twist of 0.80° (polymorph 2a) or 0.73° (polymorph 2b). In  $\alpha$ -Syn polymorph 2a, the subunits within the two protofilaments are packed in the same plane, facing each other (**Figure 1D, Figure 1-figure supplement 2C**) in two-fold symmetry, while the two protofilaments in  $\alpha$ -Syn polymorph 2b are offset by 2.45Å in height between each other, related by an approximate 2<sub>1</sub> screw symmetry (**Figure 1E, Figure 1-figure supplement 2D**). In  $\alpha$ -Syn polymorph 2a, residue K45 of one protofilament forms a salt-bridge with residue E57 of the other protofilament, and vice-versa (**Figure 1B, Figure 1-figure supplement 2A**). In  $\alpha$ -Syn polymorph 2b, the interaction between protofilaments occurs only through salt-bridges between residues K45 and E46 from adjacent protofilaments (**Figure 1C, Figure 1-figure supplement 2B**).

For polymorph 2a (PDB ID 6rt0) and polymorph 2b (PDB ID 6rtb), each  $\alpha$ -Syn molecule within a protofilament is composed of eight in-register parallel  $\beta$ -strands ( $\beta$ 0-7; **Figure 1A, D and E**): residues 16-20 ( $\beta$ 0), 38-44 ( $\beta$ 1), 46-50 ( $\beta$ 2), 52-56 ( $\beta$ 3), 61-66 ( $\beta$ 4), 68-72 ( $\beta$ 5), 76-79 ( $\beta$ 6), and 85-92 ( $\beta$ 7). These are separated by either a lysine (L45) between  $\beta$ 1 and  $\beta$ 2, glycine residues (*i.e.*, G51 between  $\beta$ 2 and  $\beta$ 3, and G67 between  $\beta$ 4 and  $\beta$ 5) or arches (*i.e.*, E57-K60 between  $\beta$ 3 and  $\beta$ 4, G73-T75 between  $\beta$ 5 and  $\beta$ 6, and K80-G84 between  $\beta$ 6 and  $\beta$ 7). The NAC region encompasses  $\beta$ -strands  $\beta$ 4 to  $\beta$ 7 and it appears entirely surrounded by densities in our cryo-EM map with  $\beta$ 1 to  $\beta$ 3 on one side of the fibril and additional densities on the other side. Minor differences between polymorphs 2a and 2b are observed in the turn between  $\beta$ 3 and  $\beta$ 4, where lower resolution does not allow for reconstruction (Figure C, D). Also, the orientation of  $\beta$ 3 remains undetermined, as it differs in the two protofibrils in the

model. Of note as well is that  $\beta 0$  is less well defined in polymorph 2b, and refinement results in a different orientation compared to polymorph 2a.

As described for  $\alpha$ -Syn polymorph 1a (Guerrero-Ferreira *et al.*, 2018), and also shown in patient-derived Tau filaments (Fitzpatrick *et al.*, 2017), there are considerable changes in the height of the  $\alpha$ -Syn monomer along the helical axis, with the highest point being  $\beta 3$  and the lowest  $\beta 4$  (**Figure 1D and E**).

$\alpha$ -Syn fibrils in polymorph 1a are formed by  $\beta$ -stands that are arranged in bent  $\beta$ -arches, running along the length of each protofilament, previously described as a Greek key-like architecture (Guerrero-Ferreira *et al.*, 2018; Li *et al.*, 2018a; Li *et al.*, 2018b; Tuttle *et al.*, 2016). Also, the polymorphs 2a and 2b reported here present bent  $\beta$ -arch motifs. However, the components and the orientation of  $\beta$ -strands contributing to the motifs are now radically different. In polymorphs 2a and 2b, two bent  $\beta$ -arches orient back-to-back, one showing a single, and the other showing two bends. The first  $\beta$ -arch is formed by strands 1/6, 2/5 and 3/4, with bends located at residues K45/V74, G51/G67, and the tip formed by K58. The strands interact through mainly hydrophobic, but also polar clusters. The second bent  $\beta$ -arch shares  $\beta$ -strands 4, 5 and 6 with the first one, and comprises in addition  $\beta$ -strand 7; again, interactions within the arch are of hydrophobic and polar type. This arch shows only one bend, at residues G67/G84.

The structure shares the extended use of glycine residues to form turns, and the hydrophobic and polar clusters forming the fibril core with other fibril structures (as for instance amyloid- $\beta$  (Gremer *et al.*, 2017; Schutz *et al.*, 2015; Walti *et al.*, 2016)), which contribute to protofilament stability, as also previously shown for  $\alpha$ -Syn polymorph 1a (Guerrero-Ferreira *et al.*, 2018; Li *et al.*, 2018a; Li *et al.*, 2018b).

Similar to  $\alpha$ -Syn polymorph 1a, hydrophilic clusters are found at the periphery of the fibril (**Figure 2**). However, in contrast to  $\alpha$ -Syn polymorph 1a, where the protofilament interface is formed by a hydrophobic steric zipper-geometry, in polymorphs 2a and 2b the interface is formed by salt-bridges.

Interestingly, residue I88 marks the beginning of a hydrophobic area composed of residues A89, A90, A91, F94 and V95, which contribute to the stabilization of an additional beta-strand density that is clearly visible in the cryo-EM maps of both polymorphs (**Figure 1B and C**). We propose that this interacting region corresponds in polymorph 2a to a hydrophobic stretch formed by residues V16 to E20, and is here termed  $\beta 0$ . This region was previously shown to be an isolated  $\beta$ -strand identified in the N-terminus of  $\alpha$ -Syn fibrils by solid-state NMR on equivalent fibril preparations (Bousset *et al.*, 2013; Gath *et al.*, 2014b) (**Figure 1-figure supplement 3A**). The localization of the stretch can be derived from cross peaks present in NMR 2D PAR (De Paepe *et al.*) spectra that connect S87 to A17, A18 and A19 (**Figure 1-figure supplement 3B**). Cross peaks in PAR spectra are indicative of proximities smaller than 6-7 Å between the spins, as illustrated in **Figure 1-figure supplement 3D**, which shows other meaningful structural restraints identified. This localizes A17, A18 and A19 in proximity to S87 (**Figure 1-figure supplement 3C**). The orientation of the N-terminal  $\beta 0$ -strand is then given by both the absence in the spectra of cross peaks between S87 and V16, as well as clear side chain density fitting K21 in the EM map. Interestingly, no signals were observed in the NMR spectra for residues M1-V15, K21-V37 and V95-A140 in the  $\alpha$ -Syn fibril structure. These regions correspond precisely to the stretches in our cryo-EM structure for which model building is not possible due to lower resolution, suggesting that

these regions are indeed disordered in this polymorph. Also, no NMR peak doubling, although present for a subset of resonances (Gath et al., 2014b), was observed for residues at the filament interface, and no distinction could be made between polymorphs 2a and 2b, indicating that the structures of the monomers in the polymorphs 2a and 2b are very close to each other. The interruption of the polypeptide chain between strands  $\beta 0$  and  $\beta 1$  in polymorph 2a and 2b, and between  $\beta 3$  and  $\beta 4$  in polymorph 2b due to lack of clear density, is compatible with a connection to the following strands of the same layer or alternatively to the neighboring layer.

For both  $\alpha$ -Syn polymorph 2a and 2b, differences in height within residues of a protofilament reveal a hydrophobic area (**Figure 2**) akin to the hydrophobic cleft described for  $\alpha$ -Syn polymorph 1a (Guerrero-Ferreira et al., 2018). It is composed of residues Q62 to V74 ( $\beta 4$ - $\beta 5$ ) (**Figure 1D** and **E**), and located between  $\beta$ -strands  $\beta 2/\beta 3$  and  $\beta 6/\beta 7$ . These residues correspond to a stretch of exclusively hydrophobic or polar residues, completely devoid of charged amino acids. Consistent with these results and with the concept that the hydrophobic core is essential for assembly, is the finding by (El-Agnaf et al., 1998) that, within the NAC region, residues E61-A78 are the amyloidogenic component. The hydrophobic cleft in  $\alpha$ -Syn polymorphs 2a and 2b contrasts with the one found in  $\alpha$ -Syn polymorph 1a, where intermolecular interactions involving residues V74-V82 may be the initial binding event responsible for fibril elongation (Guerrero-Ferreira et al., 2018).

Our structural cryo-EM analysis of  $\alpha$ -Syn fibrils prepared with E46K mutant or phosphorylated and N-terminally acetylated protein shows these also to be composed of two protofilaments and having an overall diameter of 10 nm (**Figure 3**). The lower order of these fibrils prevented a separation of the  $\alpha$ -Syn rungs along the fibril axis, but still allowed discerning the separation of individual  $\beta$ -sheets. As with polymorphs 1a, 2a and 2b,  $\beta$ -sheets in  $\alpha$ -Syn fibrils from E46K mutant, phosphorylated or N-terminally acetylated protein are arranged forming the characteristic bent  $\beta$ -arch like shape, and an arrangement closely resembling that of polymorph 2a (**Figure 3**).

### Comparison with previous structures

At first glance, the back-to-back arranged  $\beta$ -arches of polymorphs 2a and 2b appear similar to that of polymorph 1a, wrongly proposing that a mere protofilament rearrangement defines the difference between them. However, closer inspection and comparison with secondary structure elements identified in previous NMR studies on equivalent fibril preparations (Bousset et al., 2013; Gath et al., 2014b) revealed that polymorphs 2a and 2b radically differ from the construction of polymorphs 1. **Figure 4** shows the backbones of the polymorphs with different color codes for N-terminus, NAC region, and C-terminus, and **Figure 4-figure supplement 1** shows each 10 residues in a different color. When compared to polymorphs 1, the new structures of polymorphs 2a and 2b show an inverted bend of the first  $\beta$ -arch motif, comprising mainly the black and cyan segments in **Figure 4-figure supplement 1**. This motif is largely conserved between polymorphs 1a and 1b (Li et al., 2018a) (**Figure 4**, **Figure 4-figure supplement 1** and **Video 2**), where it forms part of the interfibrillar interface, once via the black segment in polymorph 1a, and once via the cyan/light green segments in polymorph 1b. In polymorphs 2, this  $\beta$ -arch is formed by an inverted amino-acid sequence: when the two motifs are superimposed, the chain runs from cyan to black in one case, in the other from black to cyan. This inversion profoundly changes the amino acid distribution within the arch between polymorphs 1 and 2. Also, the  $\beta$ -arch in polymorph 2 is extended with a second bend followed by a  $\beta$ -strand region, comprising part of the orange segment largely unobserved in polymorphs 1.

In polymorph 1, the light green chain segment forms, together with parts of the above-described first  $\beta$ -arch, a second bent  $\beta$ -arch, completed by the red segment. This motif again exists in polymorphs 2, but is located on the outside of the first arch, while in polymorph 1a it is located at the inside. Also, the arch is as well inverted, and the amino acid distribution again differs, as shown by the different arrangement of the colored segments. Polymorph 1b is devoid of this motif. A hydrophilic cavity identified in polymorph 1a (located in the bend between the black and light green segments) is also present in polymorphs 2, but there between the partly disordered pink/orange segments, and the red segment.

The different arrangements result in a radically changed interface between the protofilaments in polymorphs 1 and 2. Unlike the hydrophobic interaction between protofilaments in polymorph 1a by the black segment, and in 1b by the cyan and light green segments, the interface in the new polymorphs 2a and 2b is formed by electrostatic interactions in the green segment, through salt-bridges between residues K45 and E57, or K45 and E46, respectively in 2a and 2b polymorphs (**Figure 1-figure supplement 2C and F, Figure 1-figure supplement 3, Figure 4-figure supplement 1**).

Furthermore, the presence of an additional  $\beta$ -strand  $\beta_0$  on the periphery of the fibril (in the blue segment) is a remarkable difference between polymorphs 1 and polymorphs 2. This stretch of residues, V16-E20, forms a hydrophobic steric-zipper geometry with residues S87-A91, which are part of  $\beta_7$ , at the end of the amyloidogenic NAC region. In polymorphs 2a and 2b, this results in the N-terminus wrapping around the fibril and enclosing the NAC region (cyan, light green and red segments). This buries the serine residue at position 87, a phosphorylation site located within the NAC region, inside this interface. This is in contrast to  $\alpha$ -Syn polymorph 1a, where approximately 40 residues on both ends of the  $\alpha$ -Syn fibril are flexible and surround the fibril with a fuzzy coat, leaving part of the NAC region (*i.e.*, K80 to V95, red and magenta segments), including S87, exposed (**Figure 1B and C, Figure 4-figure supplement 1B**).

### Origin of distinct $\alpha$ -Syn polymorphs

Presently, there are four different polymorphs of  $\alpha$ -Syn fibrils known at atomic resolution, including the structures presented here (Guerrero-Ferreira *et al.*, 2018; Li *et al.*, 2018a). They can be classified into two groups with each group having a distinct fold (folds 1 and 2) (*i.e.*, at the protofilament level). Within each group there are two distinct protofilament packings or assembly polymorphisms (polymorphs a and b; **Figure 4**).

In an attempt to rationalize the origin of the distinct polymorphs we first concentrate on the distinct folds at the protofilament level. All fold 1 structures (polymorphs 1a and 1b) were grown under buffer conditions comprising either a poly-anion (*i.e.*, phosphate with three negative charges and  $N_3^-$  with having locally two negative charges) or a big chaotrope negative ion (*i.e.*  $Br^-$ ), while polymorphs 2a and 2b of wildtype  $\alpha$ -Syn were grown under phosphate-free conditions with the only anion to be  $Cl^-$  (**Table 1**). Interestingly, there are adjacent to the salt-bridge H50-E57 three lysine residues in polymorph 1a at positions K43, K45 and K58 (the latter from the other protofilament) that are close in space. Between them, Guerrero-Ferreira *et al.* (2018) observed a density in the cryo-EM map, presumably a phosphate ion of poly-anionic nature that neutralizes the repulsion of the three positive charged residues (Guerrero-Ferreira *et al.*, 2018) (**Figure 4**). Albeit still of polymorph 1a type, in presence of  $N_3^-$  the structure is distinct in this area with K58 flipping inward into the cavity forming a salt-bridge with E61 attributed to the less poly-anion-like character of  $N_3^-$ .



when compared with phosphate. In the presence of the chaotropic Br<sup>-</sup>, K58 is facing more the solvent with a closer distance between H50 and K45 (**Figure 4**). In the absence of a neutralizing poly-anion in this area of positive charged side chains or Br<sup>-</sup> exerting its chaotropic property, it is unlikely that polymorph 1 can be obtained, indicating that in the presence of Cl<sup>-</sup> as the only anion, a distinct polymorph must be formed.

The fibrils of the familial variant E46K (**Figure 3**) were also grown under phosphate conditions but adopt polymorph 2a fold. The polymorph 1a fold we obtained for the wildtype 1-121 form, introduces an electrostatic repulsion between K46 and K80, instead of the 46-80 salt-bridge stabilizing this polymorph. The structural features thus provide a rationale how changes corresponding to only a few kcal (or less) in the stability of polymorph 1a (such as absence/presence of phosphate, single point mutation), can lead the protein to adopt an entirely different polymorph. This finding also highlights the postulated flat energy landscape of fibril formation and the conformational promiscuity that comes along with it.

The fact that the polymorphs found both by Li et al. (Li et al., 2018a) and here by us are distinct, further accentuates this remark as they grew under similar conditions (except for the salt composition and additives, see **Table 1**). While the packing interfaces between polymorphs 1a and 1b are both hydrophobic, they still substantially differ, as in polymorph 1a residues V66-A78 form the interface, and in polymorph 1b residues H50-E57 form the interface (**Figure 4**). The difference is smaller in the case of polymorphs 2, where the protofilament interactions are of inter-protofilament salt-bridge character, but are packed differently. It is evident that the energy differences between the two polymorphs are therefore very minute, but still the structures are distinct.

### Familial PD mutation sites in the new $\alpha$ -Syn polymorphs

A series of familial mutations have been identified in families with a history of PD. These mutations may lead to early-onset (A30P, E46K, G51D, A53E, and A53T) or late-onset (H50Q) forms of Parkinson's disease. Their localization in the structures of the different sites is compared in **Figure 4-figure supplement 1**. The fundamentally different folds between polymorphs 1 and 2 place the familial PD mutation sites into an entirely different environment.

The E46K mutation has been found to promote  $\alpha$ -Syn phosphorylation in mice (Dettmer et al., 2017), and in neuronal cells it showed to be toxic, with toxicity being enhanced by simultaneously mutating E35 and E61 to lysines (Mbefo et al., 2015). E46 holds a central role in polymorphs 1a and 2b. In polymorph 1a, where this motif resides at the beginning of one bent  $\beta$ -arch, E46 forms a stabilizing salt-bridge with K80. In contrast, in  $\alpha$ -Syn polymorph 2b this residue is part of the protofilament interface, where the K45-E46 salt-bridge interface to E46-K45 from the other protofibril appears to be critical to the protofilament interface as these residues are the only interaction point between the protofilaments (**Figure 1-figure supplement 2**). Thus, protofilament interaction in this polymorph 2b manner would be unlikely since the mutation would induce a charge repulsion between lysines K45 and E46K from the two protofilaments. And indeed, the mutant E46K adopts polymorph 2a, which result in two lysines (*i.e.*, K45 and K46) from one protofilament interacting with E57 in the other. Interestingly, the  $\alpha$ -Syn E46K mutant fibril investigated here by cryo-EM, resulted in protofilament assembly corresponding to  $\alpha$ -Syn polymorph 2a, confirming that the interaction between K45/K46 and E57 can indeed be maintained (**Figure 3**).

Heterozygous mutations in residues H50, G51, and A53 are associated with familial forms of PD (Appel-Cresswell *et al.*, 2013; Lesage *et al.*, 2013; Pasanen *et al.*, 2014; Polymeropoulos *et al.*, 1997). As we reported previously, in  $\alpha$ -Syn polymorph 1a, these sites are an integral part of the interface region, contributing to the steric-zipper architecture and fibril stability, so that the mutations G51D, A53E and A53T are not compatible with polymorph 1a (Guerrero-Ferreira *et al.*, 2018) (**Figure 4-figure supplement 1**). In contrast, in  $\alpha$ -Syn polymorph 2a, these residues lie in the cavity formed between the two protofilaments, and in polymorph 2b they are surface-exposed where the two protofilaments interact (**Figure 3-figure supplement 1**). While these mutations are not in direct conflict with the formation of  $\alpha$ -Syn fibril polymorphs 2a and 2b, the structures of fibrils formed with these mutations remain to be determined.

The A30P mutation leads to an early-onset form of PD (Kruger *et al.*, 1998). In our structures of polymorphs 2a and 2b, a steric-zipper interface between V16-E20 and I88-A91 causes the  $\alpha$ -Syn N-terminus to wrap around the NAC region. Under these conditions, residue A30, which is the site of the A30P mutation leading to an early-onset form of PD, might be surface-exposed in a defined manner, as it forms part of the fibrillar core in the sense that it is on both sides linked to nearby structured regions. The disordered nature of the region between K21 and G37 results in weak density in the cryo-EM map, and makes accurate model building in this region difficult. Nevertheless, in  $\alpha$ -Syn polymorph 1a, A30 is not part of the fibril core but instead is found in the disordered region corresponding to residues M1 to V37 (Guerrero-Ferreira *et al.*, 2018).

### Post translational modifications (PTMs) and fibrillization in $\alpha$ -Syn polymorphs

Certain post-translational modifications of  $\alpha$ -Syn associated with neuropathology inhibit the process of  $\alpha$ -Syn fibril formation *in vitro*, suggesting that they are late events rather than occurring before protein aggregation (Oueslati *et al.*, 2010). Most of these modifications take place at the C-terminal region (Mahul-Mellier *et al.*, 2019), with the exception of acetylation and ubiquitination, which mostly affect residues in the N-terminal region. Ubiquitination alters mostly N-terminal lysines between residues 1 and 36, with K21, K23, K32 and K34 being the major sites for ubiquitin conjugation (Nonaka *et al.*, 2005). The phosphorylated and acetylated forms determined here fold into polymorph 2a (**Figure 3**). In this polymorph, the amino-acid stretch, which appears disordered in polymorph 1a fibrils, is more distinct, as the interaction of  $\beta$ -strand  $\beta$ 0 with the fibril core brings the N-terminal region back to the fibril. While the involvement of the N-terminal region has been suggested by NMR for two different polymorphs (Bousset *et al.*, 2013; Gath *et al.*, 2012; Gath *et al.*, 2014a; Gath *et al.*, 2014b), our structure for the first time shows how this N-terminal region that is important in the context of post-translational modifications, can be positioned in the protofilament.

### Implications for fibril preparation protocols

When pre-formed fibrils (PFFs) are to be studied, the protocol used for their preparation is crucial. Conditions used to prepare such samples vary (**Table 1**). It has been previously shown that  $\alpha$ -Syn polymorphism may arise when different fibrillization methods are used (Lv *et al.*, 2012; Verasdonck *et al.*, 2016). NMR has shown to be able to distinguish fibrils in polymorphic mixtures in samples, when the monomer fold differs substantially (Bousset *et al.*, 2013; Gath *et al.*, 2012; Gath *et al.*, 2014a; Gath *et al.*, 2014b; Verasdonck *et al.*, 2016). Still, NMR could for instance not distinguish between the two assembly polymorphs 2a and 2b. The here reported fibril polymorphism raises questions regarding the structural consistency of recombinant fibrils generated to study  $\alpha$ -syn *in vitro* and calls to investigate the structures resulting from different fibril preparation conditions, or to screen fibril



polymorphism in samples prepared by a single preparation protocol, in order to compile a library of  $\alpha$ -Syn polymorphs to inform studies using PFFs on cell culture or animal models.

Recently, fibrillar aggregates of Tau protein were purified from human postmortem brain from Alzheimer's, Pick's disease, and chronic traumatic encephalopathy patients, showing variations in Tau fibril conformations between diseases (Falcon *et al.*, 2018; Falcon *et al.*, 2019; Fitzpatrick *et al.*, 2017). However, to our knowledge, purification of  $\alpha$ -Syn fibrils from human brain of Parkinson's disease patients is more challenging. Existing protocols so far have only been able to produce filamentous material that co-fractionated with numerous contaminants (e.g., lipofuscin, amyloid, etc.), including membranes (Iwatsubo *et al.*, 1996). Approaches allowing to analyze the ultrastructural composition of LBs show promising results (Moors *et al.*, 2018; Shahmoradian *et al.*, 2019). But robust methods to detect the presence and possibly the polymorph of  $\alpha$ -Syn fibrils in the diseased human brain and cerebrospinal fluid, and the mechanisms by which  $\alpha$ -Syn may be causing Parkinson's disease and contribute to progression of the disease, remain to be developed.

## Conclusion

We present here two new structures of  $\alpha$ -Syn fibril polymorphs (polymorph 2a (PDB ID 6rt0), and polymorph 2b (PDB ID 2rtb)). These differ in their protofilament interfaces but are formed by the same protofibril subunit structure, which is distinct from previously described  $\alpha$ -Syn folds.

Our results describe 3D structures very different from previous work, and demonstrate how  $\alpha$ -Syn amyloid fibrils can reach different cross- $\beta$  architectures in spite of having the same amino acid sequence. The structural information from the various  $\alpha$ -Syn polymorphs allowed informed hypotheses on how amyloid fibrils may form and how their formation may be related to pathogenicity. More importantly, these structures add to the knowledge of the conformational space of this protein, which is central for structure-based design of imaging tracers or inhibitors of amyloid formation.

Determination of the structural space of fibril polymorphs, including those of  $\alpha$ -synuclein carrying disease-relevant mutations, is pivotal to discover whether and how fibrils might form or could be dissolved, and if and how they may interact with affected neurons and contribute to disease.

## Materials and Methods

### $\alpha$ -Syn expression and purification

The fibrillary polymorph or WT full length unmodified  $\alpha$ -Syn polymorph 2a and 2b were assembled from monomeric  $\alpha$ -Syn expressed and purified as described in (Bousset *et al.*, 2013; Gath *et al.*, 2014b). Briefly recombinant, wild-type  $\alpha$ -Syn was expressed in *E. coli* strain BL21(DE3), transformed with the expression vector pET3a (Novagen) encoding wild-type, full-length  $\alpha$ -Syn. Expression was induced by 0.5 mM IPTG for 2 h, when the bacteria grown in LB medium at 37 °C had reached an optical density of 1.0 at 660 nm. Soluble, monomeric  $\alpha$ -Syn was purified from the bacteria lysate as previously described (Ghee *et al.*, 2005).  $\alpha$ -Syn concentration was determined spectrophotometrically using an extinction coefficient of  $5960 \text{ M}^{-1} \cdot \text{cm}^{-1}$  at 280 nm. Pure  $\alpha$ -Syn (0.7 mM) in 50 mM Tris-HCl, pH 7.5, 150 mM KCl was filtered through sterile 0.22  $\mu\text{m}$  filters and stored at  $-80^\circ\text{C}$ .

For preparation of fibrils carrying post-translationally modifications, full-length  $\alpha$ -Syn was expressed in competent *Escherichia coli* BL21(DE3) (Stratagene, La Jolla, CA, USA) from the pRT21 expression vector. To acetylate the N-terminus, cells were pre-transfected by pNatB vector coding for the N-terminal acetylase complex (plasmid kindly provided by Daniel Mulvihill, School of Biosciences, University of Kent, Canterbury, UK) (Johnson *et al.*, 2010). The various  $\alpha$ -Syn forms were purified by periplasmic lysis, ion exchange chromatography, ammonium sulfate precipitation, and gel filtration chromatography as previously described (Guerrero-Ferreira *et al.*, 2018; Huang *et al.*, 2005; Luk *et al.*, 2009). Purified  $\alpha$ -Syn was phosphorylated using polo like kinase 2 (PLK2) expressed in *E. coli* BL21-DE3-pLysS, and isolated via its His-tag. Phosphorylated from non-phosphorylated  $\alpha$ -Syn was then separated using standard ion exchange and gel filtration chromatography. N-terminally acetylated and phosphorylated  $\alpha$ -Syn strains were cleared from endotoxins using one run of Detoxi-Gel Endotoxin Removing Gel (Thermo Scientific) or until endotoxins were below detection level. Protein sequences were verified by tryptic digestion and MALDI mass spectrometry (MS). Alternatively, HPLC/ESI tandem MS was performed to determine total mass. Coomassie blue or silver staining of the SDS PAGE gel and analytical ultracentrifugation were used to determine purity and monodispersity. Protein concentration was measured using the bicinchoninic acid (BCA) assay (Thermo Scientific) with bovine serum albumin as a standard. Purified  $\alpha$ -Syn was dialyzed in a 2 kDa Slide-A-Lyzer unit (Thermo Scientific, for max. 3 ml) against HPLC-water (VWR). Aliquots (500  $\mu\text{g}$ ) were dispensed into 1.5 ml tubes, frozen on dry ice, and lyophilized for 2h in an Eppendorf concentrator (Eppendorf) and stored at  $-80^\circ\text{C}$  until use.

Disease-linked E46K mutant  $\alpha$ -Syn was expressed and purified using a periplasmic purification protocol as described earlier (Campioni *et al.*, 2014; Huang *et al.*, 2005). Briefly, plasmid pRK172 was co-expressed with N-terminal acetyltransferase B (NatB) complex as described earlier (Johnson *et al.*, 2010). Colonies containing both plasmids (NatB and pRK172) were selected using two different antibiotics and grown in 1 liter of lysogeny broth at 37°C. After reaching an optical density of 1.0 at 600 nm, expression was induced with 1mM IPTG for 5 h. Cells were harvested and  $\alpha$ -Syn collected from the periplasmic space of the cells, using osmotic shock methods described earlier (Huang *et al.*, 2005). Protein was further purified using ion exchange chromatography and hydrophobic interaction chromatography (Campioni *et al.*, 2014).

## Fibrillization

Full-length, wildtype unmodified  $\alpha$ -Syn was incubated at 37°C for one week under continuous shaking in an Eppendorf Thermomixer set at 600 r.p.m., to assemble into fibrillar form. 700  $\mu$ M  $\alpha$ -Syn was assembled in 50 mM Tris-HCl, pH 7.5, 150 mM KCl buffer (**Table 1**).

To prepare fibrils of full-length, phosphorylated, N-terminally acetylated, N-terminally acetylated and the E46K mutant  $\alpha$ -Syn, recombinant protein (dialyzed and lyophilized) was diluted to 5 mg/mL in 200  $\mu$ L of Dulbecco's phosphate buffered saline (DPBS) buffer (Gibco; 2.66 mM KCL, 1.47 mM KH<sub>2</sub>PO<sub>4</sub>, 137.93 mM NaCl, 8.06 mM Na<sub>2</sub>HPO<sub>4</sub>·7H<sub>2</sub>O pH 7.0 – 7.3). After 5 days of incubation at 37°C with constant agitation (1,000 rpm) in an orbital mixer (Eppendorf), reactions were sonicated for 5 min in a Branson 2510 water bath, aliquoted, and stored at -80°C. All fibrils were created in the presence of an air-water interface. The presence of amyloid fibrils was confirmed by thioflavin T fluorimetry and high molecular weight assemblies were visualized by gel electrophoresis.

## Electron microscopy

Cryo-EM grids were prepared using a Leica EM GP automatic plunge freezer (Leica Microsystems) with 80% humidity at 20°C. 3  $\mu$ L aliquots were applied onto 60-second glow-discharged, 300 mesh, copper Quantifoil grids (R2/1). After blotting, grids were plunge frozen in liquid ethane cooled by liquid nitrogen.

Micrographs were acquired on a Titan Krios (ThermoFisher Scientific) transmission electron microscope, operated at 300 kV and equipped with a Gatan Quantum-LS imaging energy filter (GIF, 20eV zero loss energy window; Gatan Inc.). Images were recorded on a K2 Summit electron counting direct detection camera (Gatan Inc.) in dose fractionation mode (50 frames) using the Serial EM software (Mastrorade, 2005) at physical pixel sizes of 0.831 Å or 0.656 Å, and a total dose of ~69 electrons per square Angstrom ( $e^-/\text{\AA}^2$ ) for each micrograph. Micrographs were processed and analyzed during data collection with FOCUS (Biyani et al., 2017), applying drift-correction and dose-weighting using MotionCor2 (Zheng et al., 2017). Specific data collection parameters for the various datasets are detailed in **Table 2**.

## Image processing

Computer image processing and helical reconstruction was carried out with RELION 2.1 (Scheres, 2012) and RELION 3.0  $\beta$  (Zivanov et al., 2018), using methods described in (He and Scheres, 2017). Filament selection per micrograph was done manually in RELION 2.1. Segments were extracted with a box size of 280 pixels and an inter-box distance of 28 pixels. A summary of the number of micrographs and segments that went into the various steps of processing are presented in **Table 2**. After 2D classification with a regularization value of  $T=2$ , 2D class averages with a visible separation of individual rungs were selected for further processing. For class averages formed by segments from polymorph 2, the calculated power spectra showed a meridional peak intensity (Bessel order  $n=0$ ) at the layer line of  $1/(4.9 \text{ \AA})$ . For polymorph 2b, power spectra showed peak intensities on both sides of the meridian (Bessel order  $n=1$ ). This is the result of an approximate 2<sub>1</sub> screw symmetry between  $\alpha$ -Syn subunits on the two protofilaments (**Figure 1-figure supplement 1**). The best 2D classes were selected for a round of 3D classification with  $T=8$  and optimization of the helical twist and rise using a *helical\_z\_percentage* parameter (He and Scheres, 2017) of 10%. A cylinder generated via the helix toolbox tool was used as initial model. This resulted in 3 classes where  $\beta$ -sheets perpendicular to the fibril axis were clearly separated. Segments contributing to classes 1 and 2, which corresponded to  $\alpha$ -Syn polymorphs 2a and 2b, respectively, were

then processed separately. The 3D maps from their respective classes were used as initial models after applying a low-pass filter to 30 Å. Then, a 3D classification with a single class (K=1) and T=20, which has allowed the successful reconstruction of amyloid filaments, was carried out (Falcon *et al.*, 2018; Fitzpatrick *et al.*, 2017; Guerrero-Ferreira *et al.*, 2018).

Refinement with optimization of helical twist and rise resulted in structures with overall resolutions of 3.4 Å ( $\alpha$ -Syn polymorph 2a) and 3.7 Å ( $\alpha$ -Syn polymorph 2b). Post-processing with soft-edge masks and estimated map sharpening *B*-factors of -72.7 and -108.6 Å<sup>2</sup>, respectively, gave maps with resolutions of 3.1 Å ( $\alpha$ -Syn polymorph 2a) and 3.5 Å ( $\alpha$ -Syn polymorph 2b) (by the FSC 0.143 criterion). Local resolution values and local-resolution-filtered maps were obtained in RELION 3.0. (**Table 2, Figure 1-figure supplement 1**)

### Model building and refinement

A model for the  $\alpha$ -Syn polymorph 2a fibril was built into the RELION local resolution-filtered map with COOT (Emsley and Cowtan, 2004), by conserving as many secondary structure elements as possible from our previous  $\alpha$ -Syn polymorph 1 model (PDB ID 6h6b) (Guerrero-Ferreira *et al.*, 2018), together with the use of secondary structure information derived from ssNMRs served to establish an initial model which served as an initial model. The structure was then refined against the same map with PHENIX real space refine (Afonine *et al.*, 2013) using rotamer and Ramachandran restraints, and non-crystallographic symmetry constraints. The building and refinement of the  $\alpha$ -Syn polymorph 2b model was more challenging due to the lower resolution of the map. An initial structure was built into the  $\alpha$ -Syn polymorph 2b local resolution-filtered map by rebuilding of the  $\alpha$ -Syn polymorph 2a model using COOT. To successfully refine the structure, it was necessary to generate secondary structure restraints to refine the structure using. All structures were validated using Molprobit (Williams *et al.*, 2018).

### NMR spectroscopy

NMR spectra were recorded at 20.0 T static magnetic field using 3.2 mm rotors and a triple-resonance probe. The reproducibility of the sample preparation was previously verified with 20 ms DARR finger print spectra (Gath *et al.*, 2014b). The secondary chemical-shift analysis was based on the sequential assignments (BMRB accession code 18860) and was presented before (Gath *et al.*, 2014a; Gath *et al.*, 2014b). The PAR spectrum (De Paepe *et al.*, 2008; Lewandowski *et al.*, 2007) was recorded using a mixing time of 8 ms. The assignments for the S87/A17-19 cross peaks are unambiguous within a range of 0.15 ppm, corresponding to about ½ of the <sup>13</sup>C line width. Assignments of restraints given for reference on the full aliphatic region of the PAR spectrum in the **Figure 1-figure supplement 3** are mostly ambiguous, which prevented structure determination by NMR. Ambiguities were lifted by comparison to the here determined cryo-EM structure.

### Data availability

Raw cryo-EM micrographs are available in EMPIAR, entry numbers EMPIAR-xxxx. The 3D maps are available in the EMDB, entry numbers EMD-4994 ( $\alpha$ -Syn polymorph 2a) and EMD-4996 ( $\alpha$ -Syn-polymorph 2b). Atomic coordinates are available at the PDB with entry numbers PDB 6rt0 ( $\alpha$ -Syn polymorph 2a) and PDB 6rtb ( $\alpha$ -Syn polymorph 2b).

### Conflict of interest

D.M., M.E.L., and M.B. are fulltime employees at Roche and may additionally hold Roche stock/stock options.

R.G.F, N.M.I.T, A.A.A., P.R., J.V., R.R., J.R., R.R., R.M., B.H.M.; A.B., L.B., H.S. declare no conflict of interest.

### Author contribution

R.G.F Conceptualization, Data curation, Formal analysis, Validation, Investigation, Visualization, Methodology and Writing the manuscript.

N.M.I.T. Validation, visualization, Structural calculation, building of the structural model, contributed to data interpretation, discussion and Writing the manuscript.

A.A.A. Screen the assemblies for optimization, optimize cryo-EM freezing conditions and set up experimental conditions for particle imaging. Acquire the first high resolution Cryo-EM images of the “fibril” type of assemblies.

D.M., M.E.L., and M.B. expressed, purified and analyzed recombinant human alpha-synuclein (wt, N-acteylated, pSer129 aSyn, C-terminally truncated forms) and performed initial biochemical and biophysical characterization and quality control of generated fibrils.

M.E.L. and M.B. contributed to data interpretation and discussion.

P.R. participate to Investigation and contributed to data interpretation and discussion

J.V. acquire and interpret Solid state NMR data.

R.R. expressed, purified and analyzed recombinant human alpha-synuclein (E46K and N-acteylated form) and performed initial biochemical and biophysical characterization and quality control of generated fibrils.

RM Conceptualization, Resources, Supervision, Funding acquisition, discussion and Writing the manuscript

A.B. Conceptualization of solid-state NMR studies, supervision, building of the structural model, Investigation, discussion and writing the manuscript.

B.H.M. Conceptualization of NMR studies, Resources, Supervision, Investigation, contributed to editing the manuscript

LB expressed, purified and analyzed recombinant human alpha-synuclein (wt, unmodified form) generated fibrils. Contributed data interpretation, to building of the structural model and discussion. Writing the original draft.

H.S Conceptualization, Resources, Supervision, Funding acquisition, Investigation, Methodology, Writing—original draft, Project administration

### Acknowledgements

We thank Liz Spycher, Jana Ebner, Alexandra Kronenberger, Daniel Schlatter, Daniela Huegin, Ralph Thoma, Christian Miscenic, Martin Siegrist, Sylwia Huber, Arne Rufer, Eric Kuszniir, Peter Jakob, Tom Dunkley, Joerg Hoernschmeyer, and Johannes Erny at Roche for their technical support to clone, express, purify and characterize the different forms of  $\alpha$ -Syn; Kenneth N. Goldie, Lubomir Kovacik and Ariane Fecteau-Lefebvre for support in cryo-EM. Calculations were performed using the high-performance computing (HPC) infrastructure administered by the scientific computing center at University of Basel (sciCORE; <http://scicore.unibas.ch>). The Novo Nordisk Foundation Center for Protein Research is supported financially by the Novo Nordisk Foundation (NNF14CC0001). NMIT is a member of the Integrative Structural Biology Cluster (ISBUC) at the University of Copenhagen. This work was in part supported by the Synapsis Foundation Switzerland, the foundation Heidi-Seiler Stiftung, and the Swiss National Science Foundation (grants



CRSII3\_154461 and CRSII5\_177195 and 20020\_178792), and the French ANR (ANR-12-BS08-0013-01), the LABEX ECOFECT (ANR-11-LABX-0048) within the Université de Lyon program Investissements d'Avenir (ANR-11-IDEX-0007). The Novo Nordisk Foundation Center for Protein Research is supported financially by the Novo Nordisk Foundation (NNF14CC0001). NMIT is a member of the Integrative Structural Biology Cluster (ISBUC) at the University of Copenhagen. AAA, LB and RM received funding from the European Union's Horizon 2020 research and innovation programme under grant agreement No. 116060 (IMPRiND), the Swiss State Secretariat for Education, Research and Innovation (SERI) under contract number 17.00038, the Fondation Bettencourt Schueller, The Fondation pour la Recherche Médicale (Contract DEQ 20160334896), The Fondation Simone et Cino Del Duca of the Institut de France and the EC Joint Program on Neurodegenerative Diseases (TransPathND, ANR-17-JPCD-0002-02 and Protest-70, ANR-17-JPCD-0005-01), by the French Infrastructure for Integrated Structural Biology (FRISBI) [ANR-10-INSB-05-01]. The opinions expressed and arguments employed herein do not necessarily reflect the official views of these funding bodies.



## Tables

| Study                            | Buffer composition                                                                                                                        | pH            | Temperature      | Time                      | Concentration              | Method                  | $\alpha$ -Syn type                               | Poly-morph          | PDB                  |
|----------------------------------|-------------------------------------------------------------------------------------------------------------------------------------------|---------------|------------------|---------------------------|----------------------------|-------------------------|--------------------------------------------------|---------------------|----------------------|
| This study                       | 50 mM Tris-HCl<br>150 mM KCl                                                                                                              | 7.5           | 37°C             | 1 week<br>(600 r.p.m.)    | 700 $\mu$ M                | Cryo-EM + NMR           | Full-length<br>("named fibrils")                 | 2a, 2b              | 6rt0<br>6rtb         |
| (Guerrero-Ferreira et al., 2018) | DPBS (Gibco)<br>2.66 mM KCl,<br>1.47 mM KH <sub>2</sub> PO <sub>4</sub> ,<br>137.93 mM NaCl,<br>8.06 mM Na <sub>2</sub> HPO <sub>4</sub>  | 7 to 7.3      | 37°C             | 5 days<br>(1000 r.p.m.)   | 360 $\mu$ M<br>(5 mg/mL)   | Cryo-EM                 | Truncated<br>(1-121)                             | 1a                  | 6h6b                 |
| (Li et al., 2018b)               | 50 mM Tris, 150 mM KCl,<br>0.05 % NaN <sub>3</sub>                                                                                        | 7.5           | 37°C             | 3 days<br>(900 r.p.m.)    | 500 $\mu$ M                | Cryo-EM                 | Full-length,<br>N-terminal acetylated            | 1a                  | 6a6b                 |
| (Li et al., 2018a)               | 15 mM tetrabutylphosphonium bromide                                                                                                       | Not specified | Room temperature | 14-30 days<br>(quiescent) | 300 $\mu$ M                | Cryo-EM                 | Full-length                                      | 1a,b                | 6cu7<br>6cu8         |
| (Tuttle et al., 2016)            | 50 mM sodium phosphate<br>0.12 mM EDTA<br>0.02% sodium azide (w/v)                                                                        | 7.4           | 37 °C            | 3 weeks<br>(200 r.p.m.)   | 1000 $\mu$ M<br>(15 mg/mL) | NMR                     | Full-length                                      | 1a                  | 2n0a                 |
| (Rodriguez et al., 2015)         | 5 mM lithium hydroxide<br>20 mM sodium phosphate<br>0.1 M NaCl                                                                            | 7.5           | 37 °C            | 72 h                      | 500 $\mu$ M                | Micro-ED                | Peptides:<br>SubNACore,<br>NACore,<br>PreNAC     |                     | 4rik<br>4ril<br>4znn |
| (Rodriguez et al., 2015)         | 50 mM Tris<br>150 mM KCl                                                                                                                  | 7.5           | 37 °C            | 72 h                      | 500 $\mu$ M                | No structure            | Full-length                                      |                     |                      |
| (Gath et al., 2014b)             | 50 mM Tris-HCl<br>150 mM KCl                                                                                                              | 7.5           | 37 °C            | 4 days<br>(600 r.p.m.)    | 300 $\mu$ M                | NMR secondary structure | Full-length                                      | 2                   |                      |
| (Gath et al., 2012)              | 5 mM Tris-HCl                                                                                                                             | 7.5           | 37 °C            | 7 days<br>(600 r.p.m.)    | 300 $\mu$ M                | NMR secondary structure | Full-length                                      | Different from 1, 2 |                      |
| (Verasdonck et al., 2016)        | 5 mM NaPO <sub>4</sub>                                                                                                                    | 9             | 37 °C            | 4 days<br>(600 r.p.m.)    | 300 $\mu$ M                | NMR secondary structure | Full-length                                      | 1                   |                      |
| This study                       | DPBS (Gibco):<br>2.66 mM KCl,<br>1.47 mM KH <sub>2</sub> PO <sub>4</sub> ,<br>137.93 mM NaCl,<br>8.06 mM Na <sub>2</sub> HPO <sub>4</sub> | 7 to 7.3      | 37 °C            | 5 days<br>(1000 r.p.m.)   | 360 $\mu$ M<br>(5 mg/mL)   | Cryo-EM                 | Full-length,<br>E46K                             | 2a                  |                      |
| This study                       | DPBS (Gibco):<br>2.66 mM KCl,<br>1.47 mM KH <sub>2</sub> PO <sub>4</sub> ,<br>137.93 mM NaCl,<br>8.06 mM Na <sub>2</sub> HPO <sub>4</sub> | 7 to 7.3      | 37 °C            | 5 days<br>(1000 r.p.m.)   | 360 $\mu$ M<br>(5 mg/mL)   | Cryo-EM                 | Full-length,<br>N-terminal acetylated            | 2a                  |                      |
| This study                       | DPBS (Gibco):<br>2.66 mM KCl,<br>1.47 mM KH <sub>2</sub> PO <sub>4</sub> ,<br>137.93 mM NaCl,<br>8.06 mM Na <sub>2</sub> HPO <sub>4</sub> | 7 to 7.3      | 37 °C            | 5 days<br>(1000 r.p.m.)   | 360 $\mu$ M<br>(5 mg/mL)   | Cryo-EM                 | Full-length,<br>Phosphorylation at position S129 | 2a                  |                      |

Table 1: Growth conditions for  $\alpha$ -Syn fibrils

|                                                     | <b>E46K mutant</b> | <b>Phosphorylated</b> | <b>N-terminally acetylated</b> | <b><math>\alpha</math>-Syn poly-morph 2a</b> | <b><math>\alpha</math>-Syn poly-morph 2b</b> |
|-----------------------------------------------------|--------------------|-----------------------|--------------------------------|----------------------------------------------|----------------------------------------------|
| <b>Data Collection</b>                              |                    |                       |                                |                                              |                                              |
| Pixel size [Å]                                      | 0.831              | 0.831                 | 0.831                          | 0.656                                        | 0.656                                        |
| Defocus Range [μm]                                  | -0.8 to -2.5       | -0.8 to -2.5          | -0.8 to -2.5                   | -0.8 to -2.5                                 | -0.8 to -2.5                                 |
| Voltage [kV]                                        | 300                | 300                   | 300                            | 300                                          | 300                                          |
| Exposure time [s per frame]                         | 0.2                | 0.2                   | 0.2                            | 0.2                                          | 0.2                                          |
| Number of frames                                    | 50                 | 50                    | 50                             | 50                                           | 50                                           |
| Total dose [e <sup>-</sup> /Å <sup>2</sup> ]        | 69                 | 69                    | 69                             | 69                                           | 69                                           |
| <b>Reconstruction</b>                               |                    |                       |                                |                                              |                                              |
| Box width [pixels]                                  | 280                | 280                   | 280                            | 280                                          | 280                                          |
| Inter-box distance [pixels]                         | 28                 | 28                    | 28                             | 28                                           | 28                                           |
| Micrographs                                         | 843                | 1'887                 | 948                            | 1'143                                        | 1'143                                        |
| Manually picked fibrils                             | 2'702              | 5'095                 | 3'751                          | 5'233                                        | 5'233                                        |
| Initially extracted segments                        | 65'893             | 107'144               | 43'276                         | 100'323                                      | 100'323                                      |
| Segments after 2D classification                    | 50'514             | 107'126               | 35342                          | 100'193                                      | 100'193                                      |
| Segments after 3D classification                    | 50'514             | 21'685                | 35342                          | 19'937                                       | 28'079                                       |
| Resolution after 3D refinement [Å]                  | 4.65               | 4.47                  | 4.95                           | 3.40                                         | 3.67                                         |
| Final resolution [Å]                                | 4.3                | 4.4                   | 4.5                            | 3.06                                         | 3.46                                         |
| Estimated map sharpening B-factor [Å <sup>2</sup> ] | -187.9             | -220.7                | -223.5                         | -72.7                                        | -108.6                                       |
| Helical rise [Å]                                    | 4.98               | 4.93                  | 4.98                           | 4.92                                         | 4.91                                         |
| Helical twist [°]                                   | -0.75              | -0.94                 | -0.6                           | -0.80                                        | -0.73                                        |

Table 2: Cryo-EM structure determination statistics

|                                                      | <b><math>\alpha</math>-Syn polymorph 2a</b> | <b><math>\alpha</math>-Syn polymorph 2b</b> |
|------------------------------------------------------|---------------------------------------------|---------------------------------------------|
| Initial model used [PDB code]                        | 6rt0                                        | 6rtb                                        |
| Model resolution [ $\text{\AA}$ ]<br>(FSC=0.143)     | 3.06                                        | 3.46                                        |
| Model resolution range [ $\text{\AA}$ ]              | 3.1                                         | 3.5                                         |
| Map sharpening $B$ -factor [ $\text{\AA}^2$ ]        | -72.7                                       | -108.6                                      |
| Model composition                                    |                                             |                                             |
| Non-hydrogen atoms                                   | 4925                                        | 4681                                        |
| Protein residues                                     | 735                                         | 699                                         |
| Ligands                                              | 0                                           | 0                                           |
| $B$ -factors [ $\text{\AA}^2$ ] (non-hydrogen atoms) |                                             |                                             |
| Protein                                              | 48.05                                       | 59.45                                       |
| Ligand                                               | -                                           | -                                           |
| R.m.s. deviations                                    |                                             |                                             |
| Bond lengths [ $\text{\AA}$ ]                        | 0.06                                        | 0.009                                       |
| Bond angles [ $^\circ$ ]                             | 0.972                                       | 1.226                                       |
| Validation                                           |                                             |                                             |
| MolProbity score                                     | 1.60                                        | 2.39                                        |
| Clashscore                                           | 2.19                                        | 6.27                                        |
| Poor rotamers [%]                                    | 1.06                                        | 2.61                                        |
| Ramachandran plot                                    |                                             |                                             |
| Favored [%]                                          | 88.49                                       | 80.91                                       |
| Allowed [%]                                          | 11.51                                       | 18.94                                       |
| Disallowed [%]                                       | 0.00                                        | 2.61                                        |

Table 3: Model building statistics

## Figure Captions

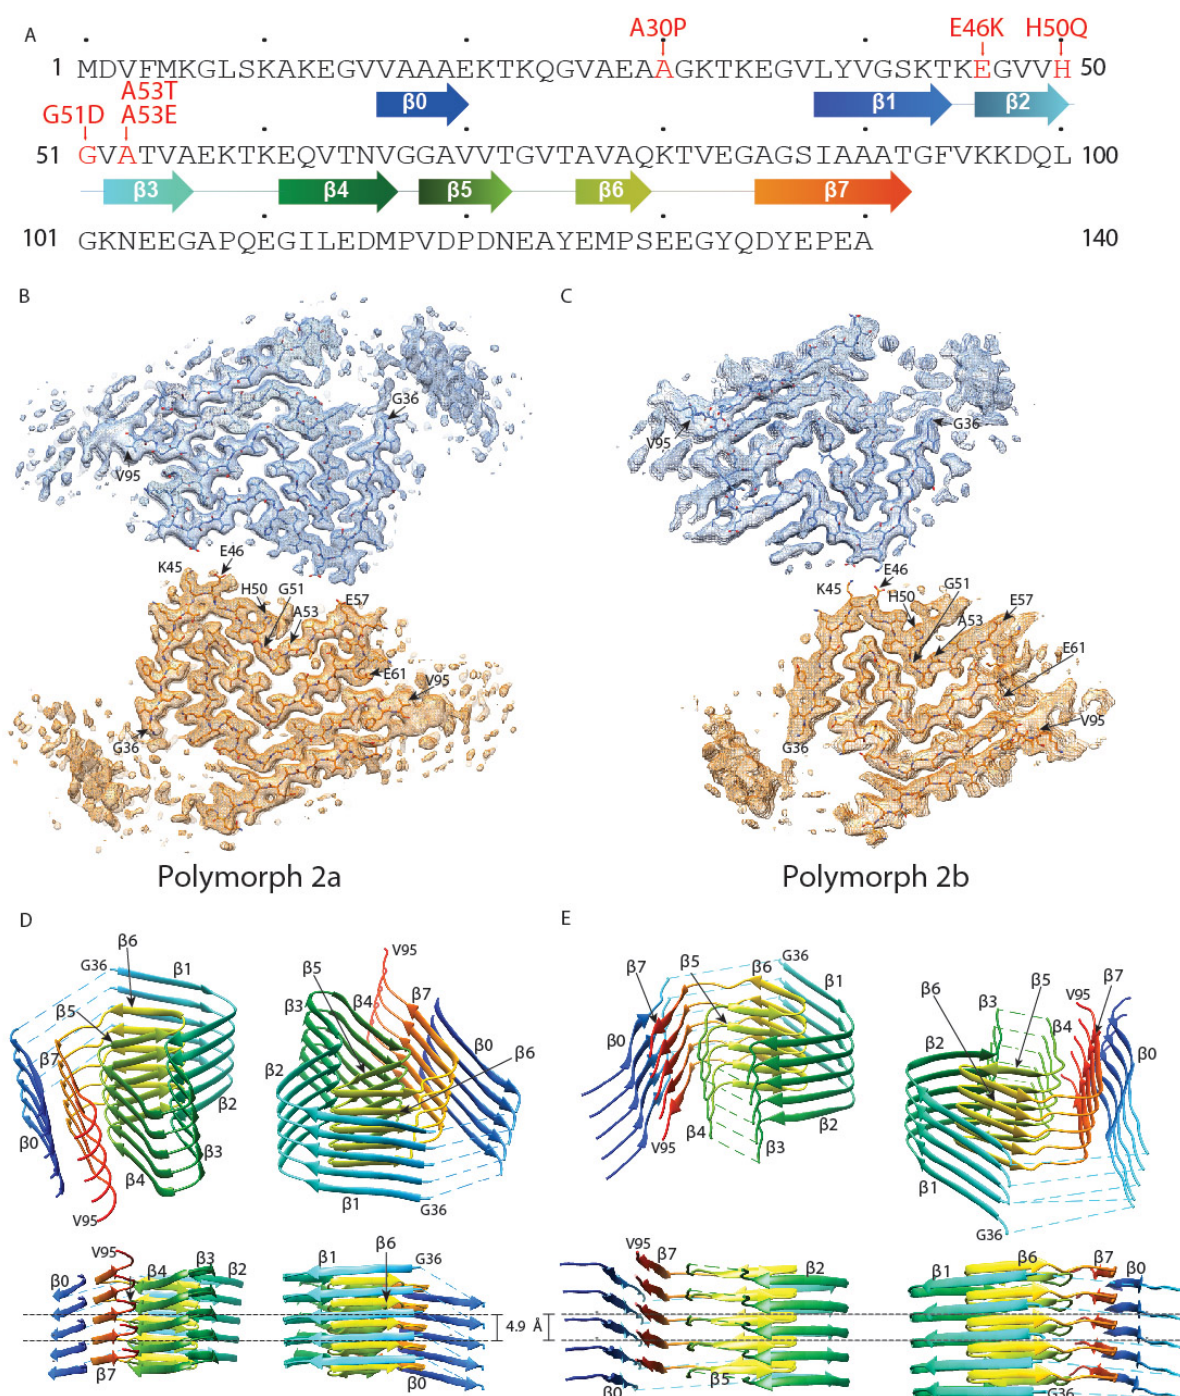

**Figure 1. Cross-sections of the  $\alpha$ -Syn polymorph 2a and 2b cryo-EM structures.**

(A) Sequence of human  $\alpha$ -Syn with familial PD mutation sites indicated in red.  $\beta$  strands are indicated by arrows colored from blue to orange. Cryo-EM densities and atomic models of polymorph 2a (B) and polymorph 2b (C) of  $\alpha$ -Syn. Each cryo-EM map shows two protofilaments (blue and orange) forming a fibril. PD-associated mutations sites, and first and last residues of the NAC regions are indicated. (D) (E) Rainbow rendering views of the secondary structure elements in five successive rungs of both polymorphs. A view perpendicular to the helical axis is shown to illustrate the height differences in a single  $\alpha$ -Syn fibril. Colors correspond to the arrows in the sequence displayed in panel (A).

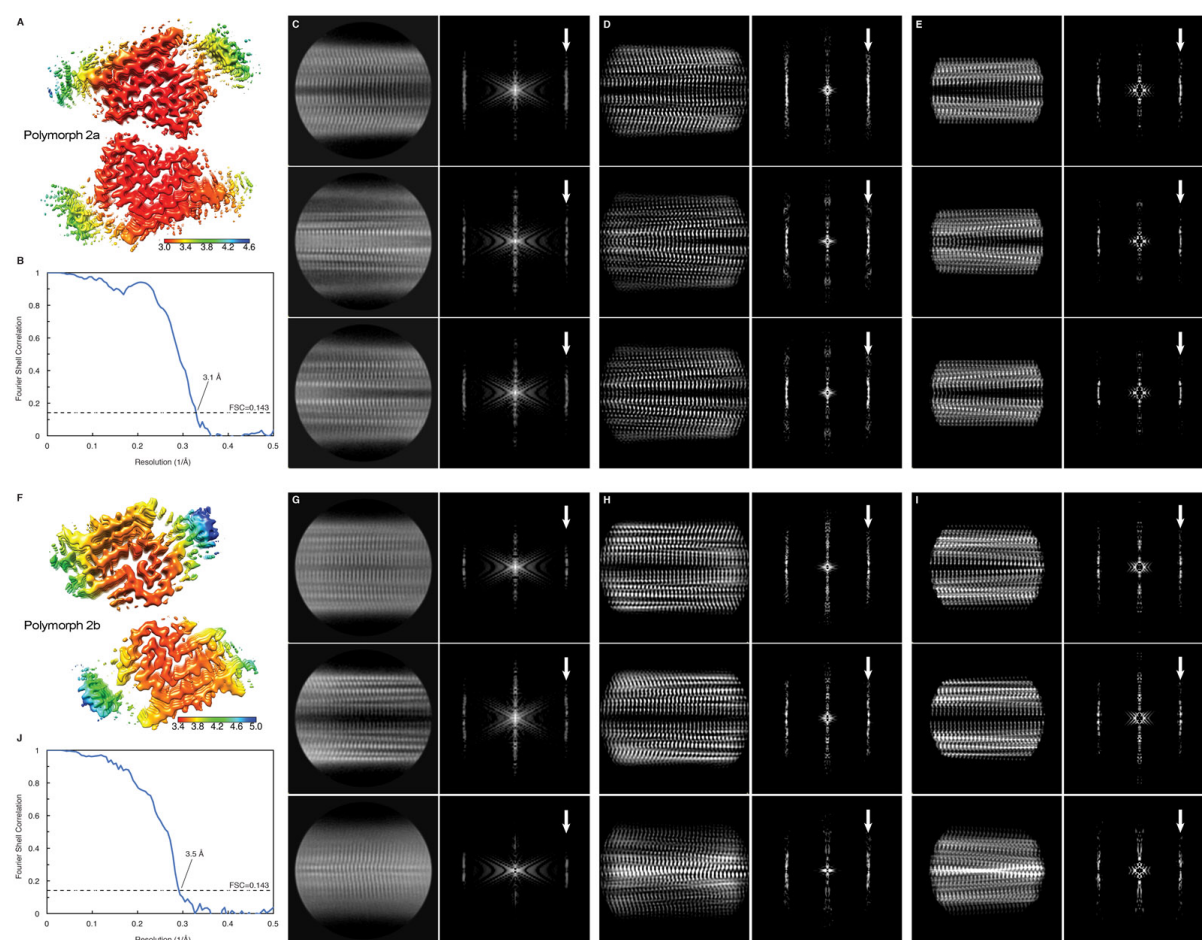

**Figure 1-figure supplement 1. Local resolution estimation and FSC curves.**

Cryo EM maps with local resolution estimations for  $\alpha$ -Syn polymorph 2a (A) and  $\alpha$ -Syn polymorph 2b (F). The color scales indicate the resolutions values within each map. (B) and (J) Fourier shell correlation curves between two independently-refined half-maps. Overall resolutions are indicated. (C) and (G) Reference-free 2D class averages with their power spectra. (D) and (H) 2D projections of the cryo-EM maps with their power spectra. (E) and (I) 2D projection of the atomic models with their power spectra. White arrows in spectrum panels indicate the layer line at  $1/4.9$  Å with either a meridional  $n=0$  Bessel function peak ( $\alpha$ -Syn polymorph 2a, panels (C) (D) and (E)), or off-meridional  $n=1$  Bessel function peak intensities ( $\alpha$ -Syn polymorph 2b, panels (G) (H) and (I)).



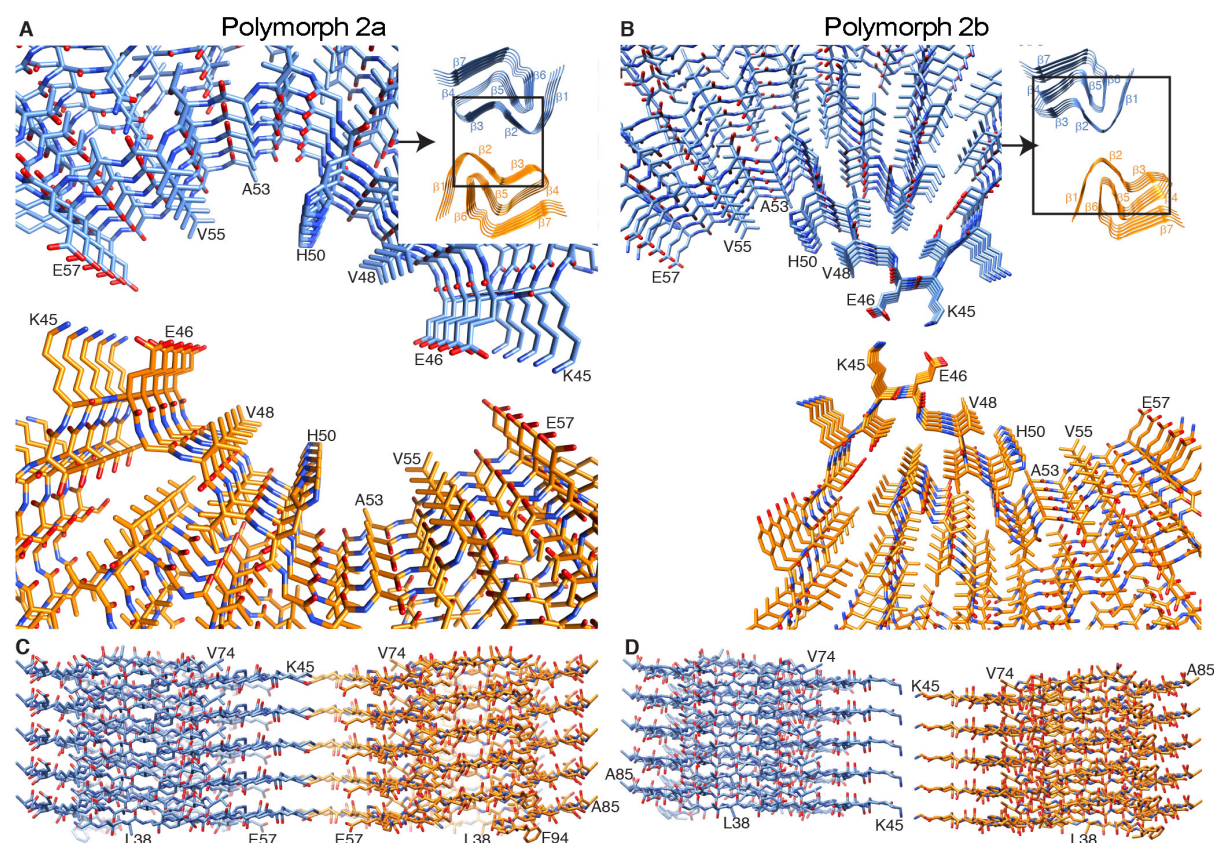

**Figure 1-figure supplement 2. Interface regions between two protofilaments of the  $\alpha$ -Syn polymorph 2a and 2b.**

(A)(B) Views along the axis of the  $\alpha$ -Syn polymorph 2a and 2b fibrils, respectively. The area shown is highlighted with squares in the ribbon diagrams (inserts). (C) (D) Side views of the fibrils showing the side-by-side alignment of  $\alpha$ -Syn molecules in polymorph 2a (C), compared to the staggered packing of  $\alpha$ -Syn molecules in polymorph 2b (D). Viewing directions in (C) and (D) are indicated by arrows in the ribbon diagrams.



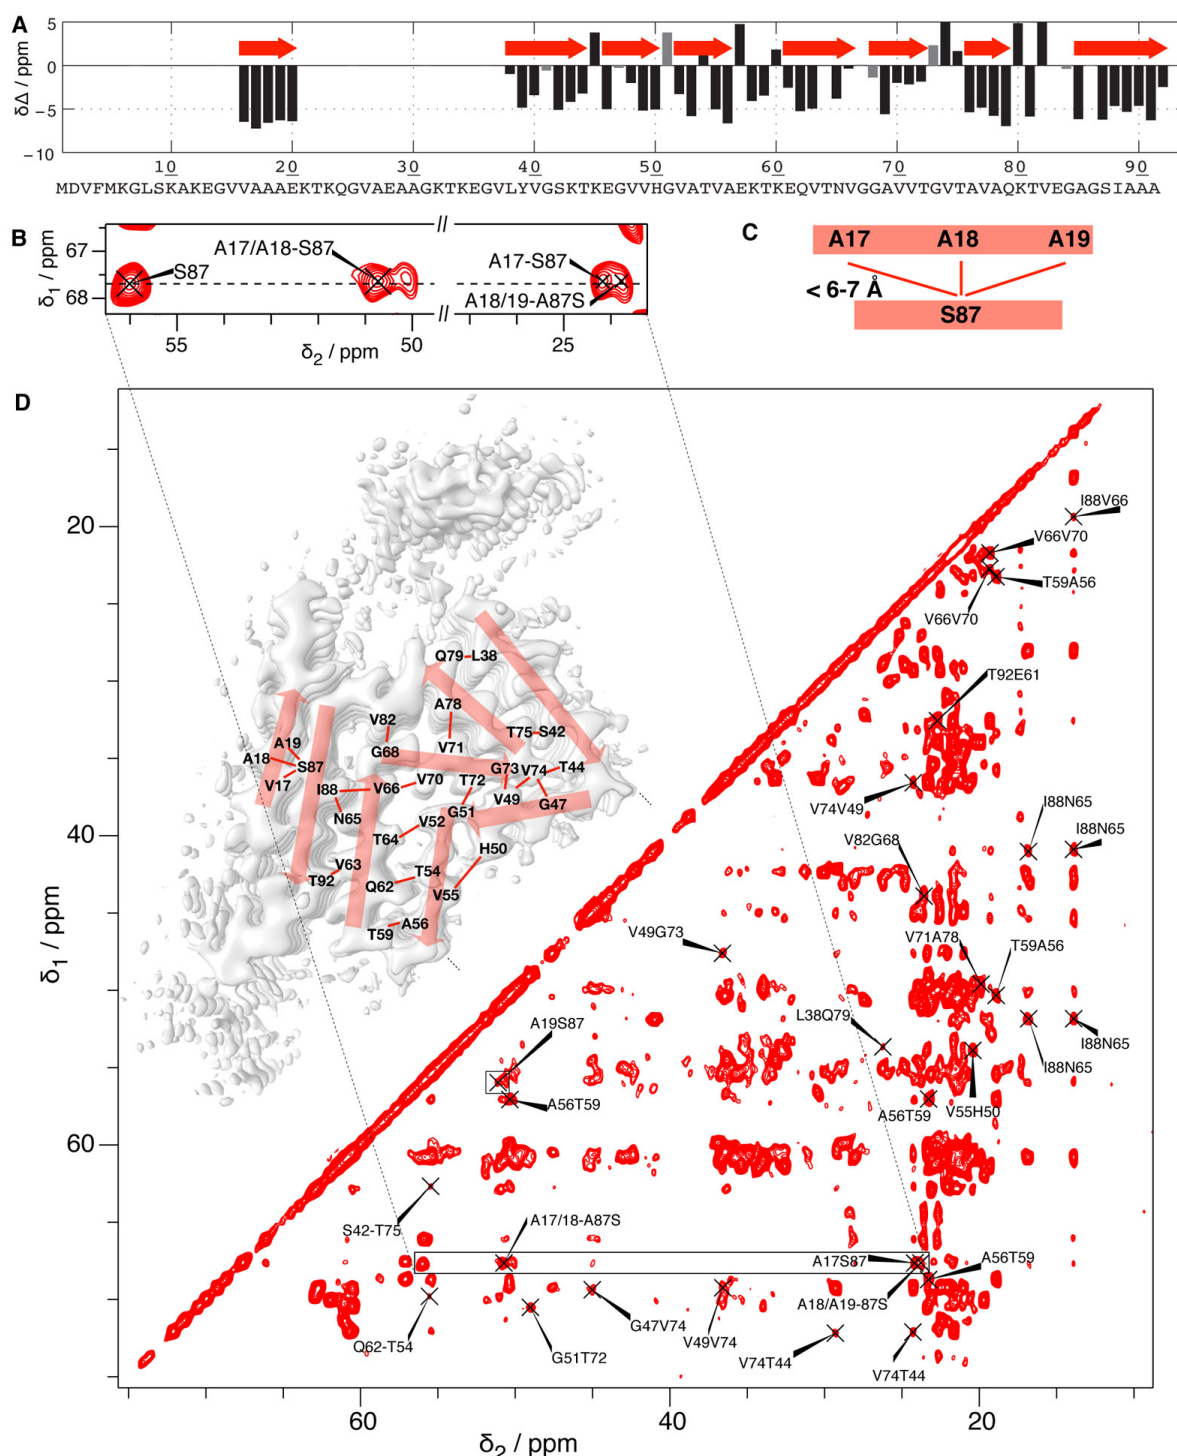

**Figure 1-figure supplement 3. NMR identification of the residues forming the N-terminal beta strand.** (A) NMR secondary chemical shift plot according to reference (Gath et al., 2014b).  $\beta$ -strands are revealed when three or more residues in a row show a negative difference of the secondary shifts  $\Delta\delta$  (the difference between the chemical-shift deviations of the observed  $\text{C}\alpha$  and  $\text{C}\beta$  shifts from the random coil shift). This information is plotted on the cryo-EM structure in red. (B) Extract of a 2D  $^{13}\text{C}$ - $^{13}\text{C}$  PAR spectrum (full aliphatic region shown in (D)) of the cross peaks assigned to S87-A17, A18, A19 interactions, for which all assignment possibilities within 0.15 ppm are indicated. (C) structural restraints resulting from the cross signals in (B), and from the A19S87 peak highlighted by a box in (D), where the full 2D  $^{13}\text{C}$ - $^{13}\text{C}$  PAR NMR spectrum is shown with assigned peaks corresponding to at least  $i, i\pm 3$  contacts (non-trivial structural restraints). Most of these peaks are ambiguous, *i.e.*, have

several assignment possibilities within 0.15 ppm, which were lifted here by comparison with the cryo-EM structures. This illustrates that the PAR spectrum indeed contains numerous structurally meaningful inter- $\beta$ -strand restraints that confirm the interpretation of the electron densities, even if the assignment ambiguities did not allow for an NMR 3D structure determination.



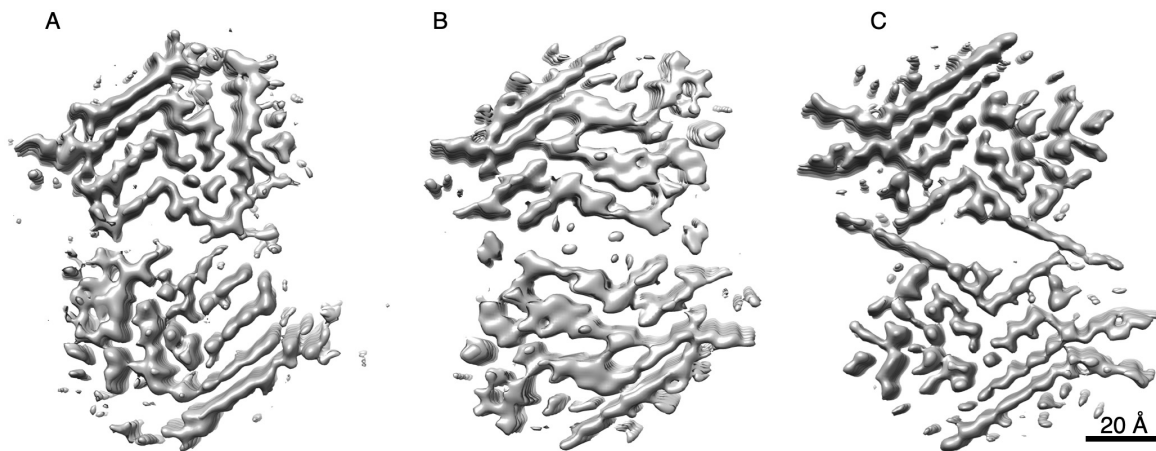

**Figure 3. Cryo-EM cross-sections of fibrils, formed by E46K, p-S129 phosphorylated, and N-terminally acetylated  $\alpha$ -Syn protein.**

Fibrils formed by E46K mutant  $\alpha$ -Syn protein (A), Ser129 phosphorylated  $\alpha$ -Syn protein (B), and N-terminally acetylated  $\alpha$ -Syn protein (C) were analyzed by cryo-EM. Image processing did not allow reaching sufficient resolution for model building, but the cross-sections of the obtained 3D reconstructions are compatible with polymorph 2a for all three forms. Scale bar: 20 Å.

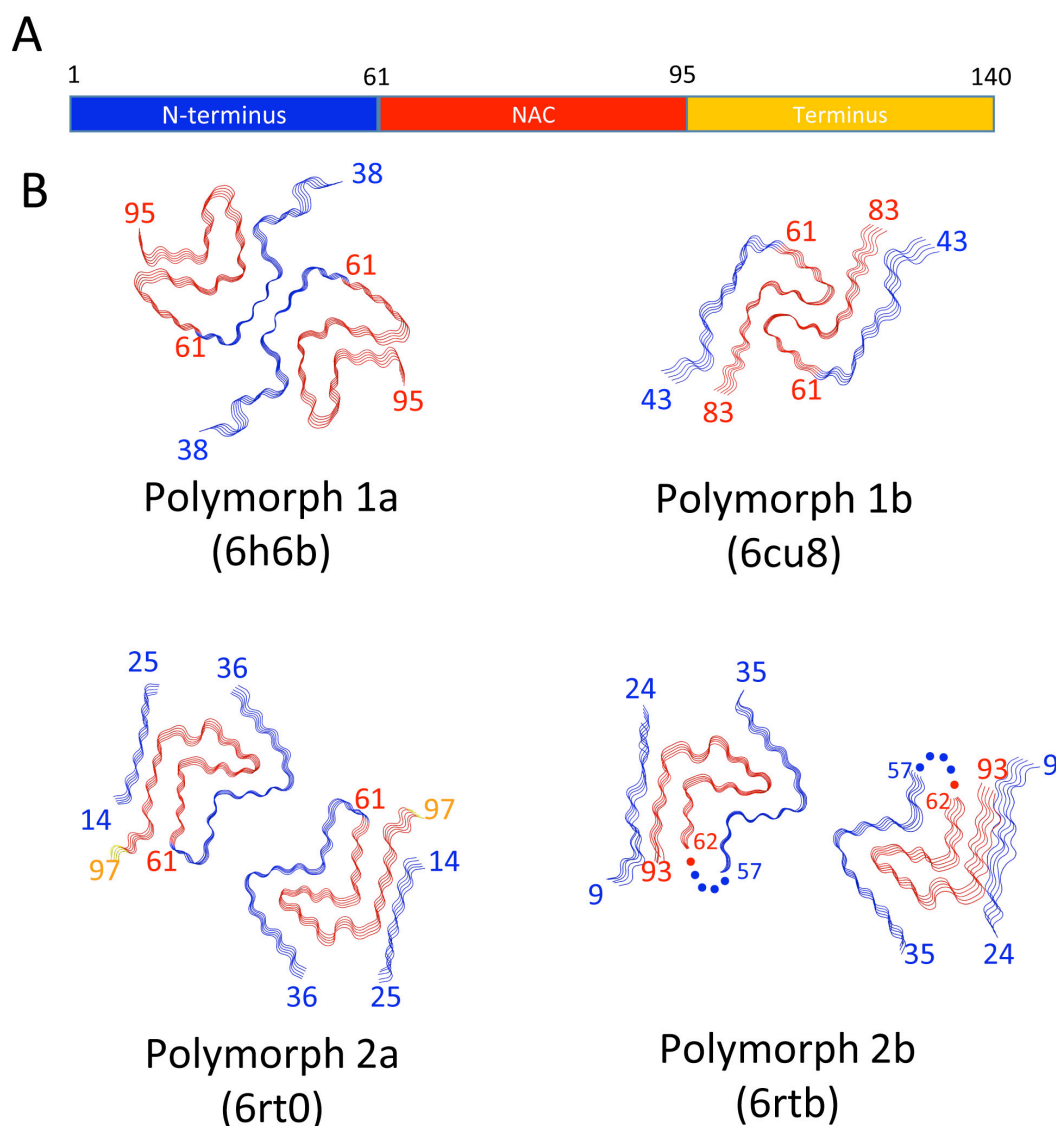

**Figure 4. Schematic representation of  $\alpha$ -Syn polymorphs.**

(A) Diagram representing  $\alpha$ -Syn regions with the N-terminus in blue, the NAC region in red and the C-terminus in yellow. (B) Representation of  $\alpha$ -Syn fibril polymorphs 1a (PDB ID 6h6b, (Guerrero-Ferreira *et al.*, 2018)), 1b (PDB ID 6cu8, (Li *et al.*, 2018a)), 2a (PDB ID 6rt0, this work), and 2b (PDB ID 6rtb, this work), highlighting the striking differences in protofilament folding in  $\alpha$ -Syn polymorphs 1a and 1b, compared to  $\alpha$ -Syn polymorphs 2a and 2b. The atomic models obtained by cryo-EM of  $\alpha$ -Syn polymorph 1a, polymorph 1b (Li *et al.*, 2018a; Li *et al.*, 2018b) and  $\alpha$ -Syn polymorphs 2a and 2b (this work). Protein Data Bank (PDB) accession numbers are indicated.



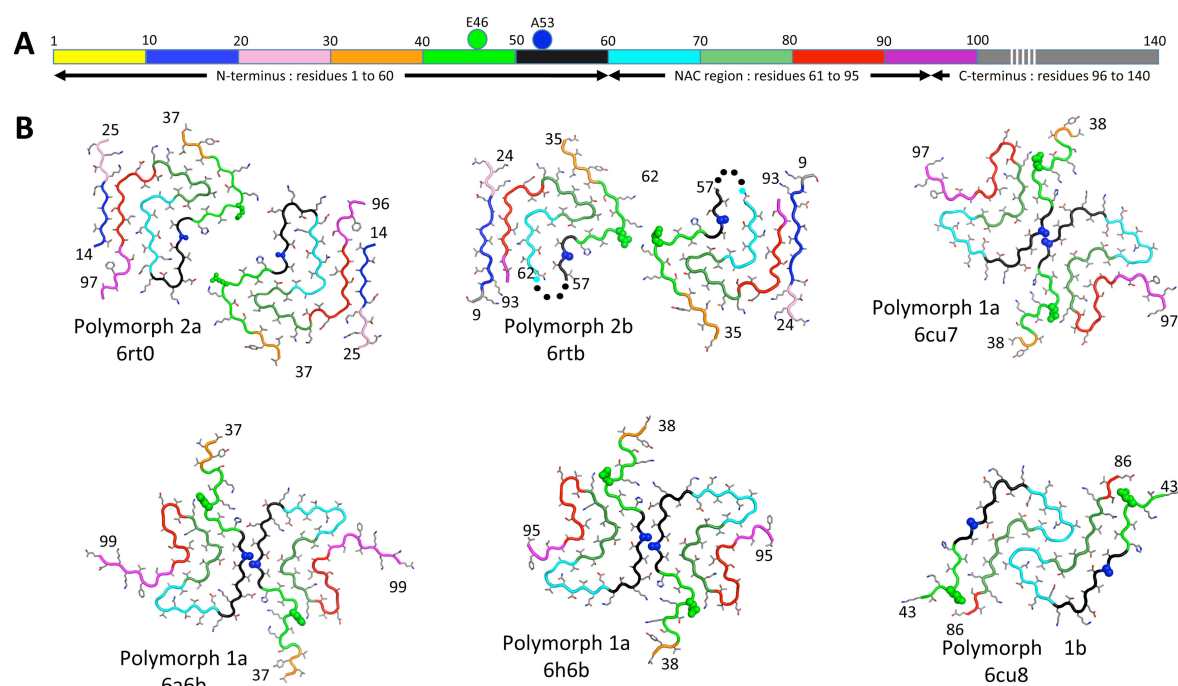

**Figure 4 – figure supplement 1. Comparison between polymorphs 1 and 2.**

Structures of polymorphs 1a, b and 2a, b with backbone shown in alternating colors in order to distinguish the location of the segments in the different structures. (A) Diagram representing  $\alpha$ -Syn color coding from N-terminus to C-terminus: 1-10, yellow; 11-20, blue; 21-30, pink; 31-40, orange; 41-50 green; 51-60, black; 61-70, cyan; 71-80, light green; 81-90, red; 91-100 magenta; 101-140, grey. (B) Worm representation of  $\alpha$ -Syn fibril polymorphs 1a, 1b, 2a and 2b. N-terminal and C-terminal residues number are indicated. Residues E53 and A53 are shown by van-der-Waals representation of the residues in green and blue respectively. Other residues are given in stick representation. Polymorph type, and PDB accession codes are indicated.



**Video 1. Comparison of cryo-EM maps of  $\alpha$ -Syn fibril polymorphs.**

Cryo-EM reconstructions of  $\alpha$ -Syn fibrils at 3.1 Å (polymorph 2a) and 3.5 Å (polymorph 2b) resolution detailing the interaction between two protofilaments (blue and orange) in each fibril, the 4.9 Å spacing between  $\beta$ -strands and the topology of  $\alpha$ -Syn monomers within a single protofilament.

**Video 2. Structural differences between  $\alpha$ -Syn polymorphs.**

Atomic models of  $\alpha$ -Syn fibrils represented as rounded ribbons with the N-terminus in blue and the NAC region in red.

## REFERENCES

- Afonine, P.V., Headd, J.J., Terwilliger, T.C., Adams, P.D., 2013. New tool: phenix\_real\_space\_refine. *Comp. Crystal. Newsletter* 4, 43-44.
- Appel-Cresswell, S., Vilarino-Guell, C., Encarnacion, M., Sherman, H., Yu, I., Shah, B., Weir, D., Thompson, C., Szu-Tu, C., Trinh, J., Aasly, J.O., Rajput, A., Rajput, A.H., Jon Stoessl, A., Farrer, M.J., 2013. Alpha-synuclein p.H50Q, a novel pathogenic mutation for Parkinson's disease. *Mov Disord* 28, 811-813.
- Bassil, F., Fernagut, P.-O., Bezard, E., Pruvost, A., Leste-Lasserre, T., Hoang, Q.Q., Ringe, D., Petsko, G.A., Meissner, W.G., 2016. Reducing C-terminal truncation mitigates synucleinopathy and neurodegeneration in a transgenic model of multiple system atrophy. *Proceedings of the National Academy of Sciences* 113, 9593-9598.
- Biyani, N., Righetto, R.D., McLeod, R., Caujolle-Bert, D., Castano-Diez, D., Goldie, K.N., Stahlberg, H., 2017. Focus: The interface between data collection and data processing in cryo-EM. *J Struct Biol* 198, 124-133.
- Bousset, L., Pieri, L., Ruiz-Arlandis, G., Gath, J., Jensen, P.H., Habenstein, B., Madiona, K., Olieric, V., Bockmann, A., Meier, B.H., Melki, R., 2013. Structural and functional characterization of two alpha-synuclein strains. *Nat Commun* 4, 2575.
- Campioni, S., Carret, G., Jordens, S., Nicoud, L., Mezzenga, R., Riek, R., 2014. The presence of an air-water interface affects formation and elongation of alpha-Synuclein fibrils. *J Am Chem Soc* 136, 2866-2875.
- Close, W., Neumann, M., Schmidt, A., Hora, M., Annamalai, K., Schmidt, M., Reif, B., Schmidt, V., Grigorieff, N., Fandrich, M., 2018. Physical basis of amyloid fibril polymorphism. *Nat Commun* 9, 699.
- Comellas, G., Lemkau, L.R., Zhou, D.H., George, J.M., Rienstra, C.M., 2012. Structural intermediates during alpha-synuclein fibrillogenesis on phospholipid vesicles. *J Am Chem Soc* 134, 5090-5099.
- Comellas, G., Lemkau, L.R., Nieuwkoop, A.J., Kloepper, K.D., Lador, D.T., Ebisu, R., Woods, W.S., Lipton, A.S., George, J.M., Rienstra, C.M., 2011. Structured regions of alpha-synuclein fibrils include the early-onset Parkinson's disease mutation sites. *J Mol Biol* 411, 881-895.
- Crowther, R.A., Jakes, R., Spillantini, M.G., Goedert, M., 1998. Synthetic filaments assembled from C-terminally truncated alpha-synuclein. *FEBS Lett* 436, 309-312.
- De Paepe, G., Lewandowski, J.R., Loquet, A., Bockmann, A., Griffin, R.G., 2008. Proton assisted recoupling and protein structure determination. *J Chem Phys* 129, 245101.
- Dettmer, U., Ramalingam, N., von Saucken, V.E., Kim, T.E., Newman, A.J., Terry-Kantor, E., Nuber, S., Ericsson, M., Fanning, S., Bartels, T., Lindquist, S., Levy, O.A., Selkoe, D., 2017. Loss of native alpha-synuclein multimerization by strategically mutating its amphipathic helix causes abnormal vesicle interactions in neuronal cells. *Hum Mol Genet* 26, 3466-3481.
- Duffy, B.M., Warner, L.R., Hou, S.T., Jiang, S.X., Gomez-Isla, T., Leenhouts, K.M., Oxford, J.T., Feany, M.B., Masliah, E., Rohn, T.T., 2007. Calpain-cleavage of alpha-synuclein: connecting proteolytic processing to disease-linked aggregation. *Am J Pathol* 170, 1725-1738.
- El-Agnaf, O.M., Jakes, R., Curran, M.D., Middleton, D., Ingenito, R., Bianchi, E., Pessi, A., Neill, D., Wallace, A., 1998. Aggregates from mutant and wild-type alpha-synuclein proteins and NAC peptide induce apoptotic cell death in human neuroblastoma cells by formation of beta-sheet and amyloid-like filaments. *FEBS Lett* 440, 71-75.

- Emsley, P., Cowtan, K., 2004. Coot: model-building tools for molecular graphics. *Acta Crystallogr D Biol Crystallogr* 60, 2126-2132.
- Falcon, B., Zhang, W., Murzin, A.G., Murshudov, G., Garringer, H.J., Vidal, R., Crowther, R.A., Ghetti, B., Scheres, S.H.W., Goedert, M., 2018. Structures of filaments from Pick's disease reveal a novel tau protein fold. *Nature* 561, 137-140.
- Falcon, B., Zivanov, J., Zhang, W., Murzin, A.G., Garringer, H.J., Vidal, R., Crowther, R.A., Newell, K.L., Ghetti, B., Goedert, M., Scheres, S.H.W., 2019. Novel tau filament fold in chronic traumatic encephalopathy encloses hydrophobic molecules. *Nature*.
- Fandrich, M., Nystrom, S., Nilsson, K.P.R., Bockmann, A., LeVine, H., 3rd, Hammarstrom, P., 2018. Amyloid fibril polymorphism: a challenge for molecular imaging and therapy. *J Intern Med* 283, 218-237.
- Fitzpatrick, A.W.P., Falcon, B., He, S., Murzin, A.G., Murshudov, G., Garringer, H.J., Crowther, R.A., Ghetti, B., Goedert, M., Scheres, S.H.W., 2017. Cryo-EM structures of tau filaments from Alzheimer's disease. *Nature* 547, 185-190.
- Gath, J., Habenstein, B., Bousset, L., Melki, R., Meier, B.H., Bockmann, A., 2012. Solid-state NMR sequential assignments of alpha-synuclein. *Biomol NMR Assign* 6, 51-55.
- Gath, J., Bousset, L., Habenstein, B., Melki, R., Bockmann, A., Meier, B.H., 2014a. Unlike twins: an NMR comparison of two alpha-synuclein polymorphs featuring different toxicity. *PLoS One* 9, e90659.
- Gath, J., Bousset, L., Habenstein, B., Melki, R., Meier, B.H., Bockmann, A., 2014b. Yet another polymorph of alpha-synuclein: solid-state sequential assignments. *Biomol NMR Assign* 8, 395-404.
- George, J.M., 2002. The synucleins. *Genome Biol* 3, REVIEWS3002.
- George, J.M., Jin, H., Woods, W.S., Clayton, D.F., 1995. Characterization of a novel protein regulated during the critical period for song learning in the zebra finch. *Neuron* 15, 361-372.
- Ghee, M., Melki, R., Michot, N., Mallet, J., 2005. PA700, the regulatory complex of the 26S proteasome, interferes with alpha-synuclein assembly. *FEBS J* 272, 4023-4033.
- Giasson, B.I., Murray, I.V., Trojanowski, J.Q., Lee, V.M., 2001. A hydrophobic stretch of 12 amino acid residues in the middle of alpha-synuclein is essential for filament assembly. *J Biol Chem* 276, 2380-2386.
- Gremer, L., Scholzel, D., Schenk, C., Reinartz, E., Labahn, J., Ravelli, R.B.G., Tusche, M., Lopez-Iglesias, C., Hoyer, W., Heise, H., Willbold, D., Schroder, G.F., 2017. Fibril structure of amyloid-beta(1-42) by cryo-electron microscopy. *Science* 358, 116-119.
- Guerrero-Ferreira, R., Taylor, N.M., Mona, D., Ringler, P., Lauer, M.E., Riek, R., Britschgi, M., Stahlberg, H., 2018. Cryo-EM structure of alpha-synuclein fibrils. *Elife* 7.
- Hashimoto, M., Hsu, L.J., Sisk, A., Xia, Y., Takeda, A., Sundsmo, M., Masliah, E., 1998. Human recombinant NACP/alpha-synuclein is aggregated and fibrillated in vitro: relevance for Lewy body disease. *Brain Res* 799, 301-306.
- He, S., Scheres, S.H.W., 2017. Helical reconstruction in RELION. *J Struct Biol* 198, 163-176.
- Heise, H., Hoyer, W., Becker, S., Andronesi, O.C., Riedel, D., Baldus, M., 2005. Molecular-level secondary structure, polymorphism, and dynamics of full-length alpha-synuclein fibrils studied by solid-state NMR. *Proc Natl Acad Sci U S A* 102, 15871-15876.
- Huang, C., Ren, G., Zhou, H., Wang, C.C., 2005. A new method for purification of recombinant human alpha-synuclein in *Escherichia coli*. *Protein Expr Purif* 42, 173-177.

- Ibanez, P., Bonnet, A.M., Debarges, B., Lohmann, E., Tison, F., Pollak, P., Agid, Y., Durr, A., Brice, A., 2004. Causal relation between alpha-synuclein gene duplication and familial Parkinson's disease. *Lancet* 364, 1169-1171.
- Iwatsubo, T., Yamaguchi, H., Fujimuro, M., Yokosawa, H., Ihara, Y., Trojanowski, J.Q., Lee, V.M., 1996. Purification and characterization of Lewy bodies from the brains of patients with diffuse Lewy body disease. *Am J Pathol* 148, 1517-1529.
- Jakes, R., Spillantini, M.G., Goedert, M., 1994. Identification of two distinct synucleins from human brain. *FEBS Lett* 345, 27-32.
- Johnson, M., Coulton, A.T., Geeves, M.A., Mulvihill, D.P., 2010. Targeted Amino-Terminal Acetylation of Recombinant Proteins in *E. coli*. *PLOS ONE* 5, e15801.
- Kruger, R., Kuhn, W., Muller, T., Woitalla, D., Graeber, M., Kosel, S., Przuntek, H., Epplen, J.T., Schols, L., Riess, O., 1998. Ala30Pro mutation in the gene encoding alpha-synuclein in Parkinson's disease. *Nat Genet* 18, 106-108.
- Lesage, S., Anheim, M., Letournel, F., Bousset, L., Honore, A., Rozas, N., Pieri, L., Madiona, K., Durr, A., Melki, R., Verny, C., Brice, A., French Parkinson's Disease Genetics Study, G., 2013. G51D alpha-synuclein mutation causes a novel parkinsonian-pyramidal syndrome. *Ann Neurol* 73, 459-471.
- Lewandowski, J.R., De Paepe, G., Griffin, R.G., 2007. Proton assisted insensitive nuclei cross polarization. *J Am Chem Soc* 129, 728-729.
- Li, B., Ge, P., Murray, K.A., Sheth, P., Zhang, M., Nair, G., Sawaya, M.R., Shin, W.S., Boyer, D.R., Ye, S., Eisenberg, D.S., Zhou, Z.H., Jiang, L., 2018a. Cryo-EM of full-length  $\alpha$ -synuclein reveals fibril polymorphs with a common structural kernel. *Nature Communications* 9, 3609.
- Li, H.T., Du, H.N., Tang, L., Hu, J., Hu, H.Y., 2002. Structural transformation and aggregation of human alpha-synuclein in trifluoroethanol: non-amyloid component sequence is essential and beta-sheet formation is prerequisite to aggregation. *Biopolymers* 64, 221-226.
- Li, W., West, N., Colla, E., Pletnikova, O., Troncoso, J.C., Marsh, L., Dawson, T.M., Jakala, P., Hartmann, T., Price, D.L., Lee, M.K., 2005. Aggregation promoting C-terminal truncation of alpha-synuclein is a normal cellular process and is enhanced by the familial Parkinson's disease-linked mutations. *Proc Natl Acad Sci U S A* 102, 2162-2167.
- Li, W.W., Yang, R., Guo, J.C., Ren, H.M., Zha, X.L., Cheng, J.S., Cai, D.F., 2007. Localization of alpha-synuclein to mitochondria within midbrain of mice. *Neuroreport* 18, 1543-1546.
- Li, Y., Zhao, C., Luo, F., Liu, Z., Gui, X., Luo, Z., Zhang, X., Li, D., Liu, C., Li, X., 2018b. Amyloid fibril structure of  $\alpha$ -synuclein determined by cryo-electron microscopy. *Cell Research* 28, 897-903.
- Liu, C.W., Giasson, B.I., Lewis, K.A., Lee, V.M., Demartino, G.N., Thomas, P.J., 2005. A precipitating role for truncated alpha-synuclein and the proteasome in alpha-synuclein aggregation: implications for pathogenesis of Parkinson disease. *J Biol Chem* 280, 22670-22678.
- Luk, K.C., Song, C., O'Brien, P., Stieber, A., Branch, J.R., Brunden, K.R., Trojanowski, J.Q., Lee, V.M., 2009. Exogenous alpha-synuclein fibrils seed the formation of Lewy body-like intracellular inclusions in cultured cells. *Proc Natl Acad Sci U S A* 106, 20051-20056.

- Lv, G., Kumar, A., Giller, K., Orcellet, M.L., Riedel, D., Fernandez, C.O., Becker, S., Lange, A., 2012. Structural comparison of mouse and human alpha-synuclein amyloid fibrils by solid-state NMR. *J Mol Biol* 420, 99-111.
- Mahul-Mellier, A.-L., Altay, M.F., Bartscher, J., Maharjan, N., Ait-Bouziad, N., Chiki, A., Vingill, S., Wade-Martins, R., Holton, J.L., Strand, C., Haikal, C., Li, J.-Y., Hamelin, R., Croisier, M., Knott, G., Mairet-Coello, G., Weerens, L., Michel, A., Downey, P., Citron, M., Lashuel, H.A., 2019. The making of a Lewy body: the role of alpha-synuclein post-fibrillization modifications in regulating the formation and the maturation of pathological inclusions. *bioRxiv.org*, <https://doi.org/10.1101/500058>.
- Mastronarde, D.N., 2005. Automated electron microscope tomography using robust prediction of specimen movements. *J Struct Biol* 152, 36-51.
- Mbefo, M.K., Fares, M.B., Paleologou, K., Oueslati, A., Yin, G., Tenreiro, S., Pinto, M., Outeiro, T., Zweckstetter, M., Masliah, E., Lashuel, H.A., 2015. Parkinson disease mutant E46K enhances alpha-synuclein phosphorylation in mammalian cell lines, in yeast, and in vivo. *J Biol Chem* 290, 9412-9427.
- Meier, B.H., Bockmann, A., 2015. The structure of fibrils from 'misfolded' proteins. *Curr Opin Struct Biol* 30, 43-49.
- Moors, T.E., Maat, C.A., Niedieker, D., Mona, D., Petersen, D., Timmermans-Huisman, E., Kole, J., El-Mashtoly, S.F., Zago, W., Barbour, R., Mundigl, O., Kaluza, K., Huber, S., Hug, M.N., Kremer, T., Ritter, M., Dziadek, S., Geurts, J.J.G., Gerwert, K., Britschgi, M., van de Berg, W.D.J., 2018. Detailed structural orchestration of Lewy pathology in Parkinson's disease as revealed by 3D multicolor STED microscopy. *bioRxiv*, 470476.
- Nonaka, T., Iwatsubo, T., Hasegawa, M., 2005. Ubiquitination of alpha-synuclein. *Biochemistry* 44, 361-368.
- Oueslati, A., Fournier, M., Lashuel, H.A., 2010. Chapter 7 - Role of post-translational modifications in modulating the structure, function and toxicity of  $\alpha$ -synuclein: Implications for Parkinson's disease pathogenesis and therapies, p. 115-145, in: A. Björklund and M. A. Cenci, (Eds.), *Progress in Brain Research*, Elsevier.
- Pasanen, P., Myllykangas, L., Siitonen, M., Raunio, A., Kaakkola, S., Lyytinen, J., Tienari, P.J., Poyhonen, M., Paetau, A., 2014. Novel alpha-synuclein mutation A53E associated with atypical multiple system atrophy and Parkinson's disease-type pathology. *Neurobiol Aging* 35, 2180 e2181-2185.
- Peelaerts, W., Bousset, L., Van der Perren, A., Moskalyuk, A., Pulizzi, R., Giugliano, M., Van den Haute, C., Melki, R., Baekelandt, V., 2015. alpha-Synuclein strains cause distinct synucleinopathies after local and systemic administration. *Nature* 522, 340-344.
- Perrin, R.J., Woods, W.S., Clayton, D.F., George, J.M., 2000. Interaction of human alpha-Synuclein and Parkinson's disease variants with phospholipids. Structural analysis using site-directed mutagenesis. *J Biol Chem* 275, 34393-34398.
- Polymeropoulos, M.H., Lavedan, C., Leroy, E., Ide, S.E., Dehejia, A., Dutra, A., Pike, B., Root, H., Rubenstein, J., Boyer, R., Stenroos, E.S., Chandrasekharappa, S., Athanassiadou, A., Papapetropoulos, T., Johnson, W.G., Lazzarini, A.M., Duvoisin, R.C., Di Iorio, G., Golbe, L.I., Nussbaum, R.L., 1997. Mutation in the alpha-synuclein gene identified in families with Parkinson's disease. *Science* 276, 2045-2047.
- Post, M.R., Lieberman, O.J., Mosharov, E.V., 2018. Can Interactions Between  $\alpha$ -Synuclein, Dopamine and Calcium Explain Selective Neurodegeneration in Parkinson's Disease? *Frontiers in Neuroscience* 12, 161.



- Prasad, K., Beach, T.G., Hedreen, J., Richfield, E.K., 2012. Critical role of truncated alpha-synuclein and aggregates in Parkinson's disease and incidental Lewy body disease. *Brain Pathol* 22, 811-825.
- Riek, R., 2017. The Three-Dimensional Structures of Amyloids. *Cold Spring Harb Perspect Biol* 9.
- Rodriguez, J.A., Ivanova, M.I., Sawaya, M.R., Cascio, D., Reyes, F.E., Shi, D., Sangwan, S., Guenther, E.L., Johnson, L.M., Zhang, M., Jiang, L., Arbing, M.A., Nannenga, B.L., Hattne, J., Whitelegge, J., Brewster, A.S., Messerschmidt, M., Boutet, S., Sauter, N.K., Gonen, T., Eisenberg, D.S., 2015. Structure of the toxic core of alpha-synuclein from invisible crystals. *Nature* 525, 486-490.
- Scheres, S.H., 2012. RELION: implementation of a Bayesian approach to cryo-EM structure determination. *J Struct Biol* 180, 519-530.
- Schutz, A.K., Vagt, T., Huber, M., Ovchinnikova, O.Y., Cadalbert, R., Wall, J., Guntert, P., Bockmann, A., Glockshuber, R., Meier, B.H., 2015. Atomic-resolution three-dimensional structure of amyloid beta fibrils bearing the Osaka mutation. *Angew Chem Int Ed Engl* 54, 331-335.
- Shahmoradian, S.H., Lewis, A.J., Genoud, C., Hench, J., Moors, T., Navarro, P.P., Castano-Diez, D., Schweighauser, G., Graff-Meyer, A., Goldie, K.N., Suetterlin, R., Huisman, E., Ingrassia, A., de Gier, Y., Rozemuller, A.J.M., Wang, J., Da Paepe, A., Erny, J., Staempfli, A., Hoernschemeyer, J., Grosserueschkamp, F., Niedieker, D., El-Mashtoly, S.F., Quadri, M., van IJcken, W.F.J., Bonifati, V., Gerwert, K., Bohrmann, B., Frank, S., Britschgi, M., Stahlberg, H., van de Berg, W., Lauer, M.E., 2019. Lewy pathology in Parkinson's disease consists of crowded organelles and lipid membranes. *Nature Neuroscience* (in press).
- Singleton, A.B., Farrer, M., Johnson, J., Singleton, A., Hague, S., Kachergus, J., Hulihan, M., Peuralinna, T., Dutra, A., Nussbaum, R., Lincoln, S., Crawley, A., Hanson, M., Maraganore, D., Adler, C., Cookson, M.R., Muenter, M., Baptista, M., Miller, D., Blacato, J., Hardy, J., Gwinn-Hardy, K., 2003. alpha-Synuclein locus triplication causes Parkinson's disease. *Science* 302, 841.
- Spillantini, M.G., Crowther, R.A., Jakes, R., Hasegawa, M., Goedert, M., 1998.  $\alpha$ -Synuclein in filamentous inclusions of Lewy bodies from Parkinson's disease and dementia with Lewy bodies. *Proceedings of the National Academy of Sciences* 95, 6469-6473.
- Spillantini, M.G., Schmidt, M.L., Lee, V.M., Trojanowski, J.Q., Jakes, R., Goedert, M., 1997. Alpha-synuclein in Lewy bodies. *Nature* 388, 839-840.
- Stefanis, L., 2012. alpha-Synuclein in Parkinson's disease. *Cold Spring Harb Perspect Med* 2, a009399.
- Tuttle, M.D., Comellas, G., Nieuwkoop, A.J., Covell, D.J., Berthold, D.A., Kloepper, K.D., Courtney, J.M., Kim, J.K., Barclay, A.M., Kendall, A., Wan, W., Stubbs, G., Schwieters, C.D., Lee, V.M., George, J.M., Rienstra, C.M., 2016. Solid-state NMR structure of a pathogenic fibril of full-length human alpha-synuclein. *Nat Struct Mol Biol* 23, 409-415.
- Ueda, K., Fukushima, H., Masliah, E., Xia, Y., Iwai, A., Yoshimoto, M., Otero, D.A., Kondo, J., Ihara, Y., Saitoh, T., 1993. Molecular cloning of cDNA encoding an unrecognized component of amyloid in Alzheimer disease. *Proc Natl Acad Sci U S A* 90, 11282-11286.

- Verasdonck, J., Bousset, L., Gath, J., Melki, R., Bockmann, A., Meier, B.H., 2016. Further exploration of the conformational space of alpha-synuclein fibrils: solid-state NMR assignment of a high-pH polymorph. *Biomol NMR Assign* 10, 5-12.
- Vilar, M., Chou, H.T., Luhers, T., Maji, S.K., Riek-Loher, D., Verel, R., Manning, G., Stahlberg, H., Riek, R., 2008. The fold of alpha-synuclein fibrils. *Proc Natl Acad Sci U S A* 105, 8637-8642.
- Walti, M.A., Ravotti, F., Arai, H., Glabe, C.G., Wall, J.S., Bockmann, A., Guntert, P., Meier, B.H., Riek, R., 2016. Atomic-resolution structure of a disease-relevant Abeta(1-42) amyloid fibril. *Proc Natl Acad Sci U S A* 113, E4976-4984.
- Wang, W., Nguyen, L.T.T., Burlak, C., Chegini, F., Guo, F., Chataway, T., Ju, S., Fisher, O.S., Miller, D.W., Datta, D., Wu, F., Wu, C.-X., Landru, A., Wells, J.A., Cookson, M.R., Boxer, M.B., Thomas, C.J., Gai, W.P., Ringe, D., Petsko, G.A., Hoang, Q.Q., 2016. Caspase-1 causes truncation and aggregation of the Parkinson's disease-associated protein  $\alpha$ -synuclein. *Proceedings of the National Academy of Sciences* 113, 9587-9592.
- Williams, C.J., Headd, J.J., Moriarty, N.W., Prisant, M.G., Videau, L.L., Deis, L.N., Verma, V., Keedy, D.A., Hintze, B.J., Chen, V.B., Jain, S., Lewis, S.M., Arendall, W.B., 3rd, Snoeyink, J., Adams, P.D., Lovell, S.C., Richardson, J.S., Richardson, D.C., 2018. MolProbity: More and better reference data for improved all-atom structure validation. *Protein Sci* 27, 293-315.
- Zarranz, J.J., Alegre, J., Gomez-Esteban, J.C., Lezcano, E., Ros, R., Ampuero, I., Vidal, L., Hoenicka, J., Rodriguez, O., Atares, B., Llorens, V., Gomez Tortosa, E., del Ser, T., Munoz, D.G., de Yebenes, J.G., 2004. The new mutation, E46K, of alpha-synuclein causes Parkinson and Lewy body dementia. *Ann Neurol* 55, 164-173.
- Zheng, S.Q., Palovcak, E., Armache, J.P., Verba, K.A., Cheng, Y., Agard, D.A., 2017. MotionCor2: anisotropic correction of beam-induced motion for improved cryo-electron microscopy. *Nat Methods* 14, 331-332.
- Zivanov, J., Nakane, T., Forsberg, B.O., Kimanius, D., Hagen, W.J., Lindahl, E., Scheres, S.H., 2018. New tools for automated high-resolution cryo-EM structure determination in RELION-3. *Elife* 7.
